1 **Exogenous DNA upregulates DUOX2 expression and function in human pancreatic cancer**  
2 **cells by activating the cGAS-STING signaling pathway**

3  
4 Stephen L. Wang<sup>1,\*</sup>, Yongzhong Wu<sup>1,\*</sup>, Mariam Konaté<sup>2</sup>, Jiamo Lu<sup>1</sup>, Smitha Antony<sup>2</sup>, Jennifer L.  
5 Meitzler<sup>1</sup>, Guojian Jiang<sup>1</sup>, Iris Dahan<sup>2</sup>, Agnes Juhasz<sup>1</sup>, Becky Diebold<sup>1</sup>, Krishnendu Roy<sup>2</sup>, and  
6 James H. Doroshov<sup>1,2</sup>

7  
8 <sup>1</sup>Developmental Therapeutics Branch, Center for Cancer Research, National Cancer Institute,  
9 NIH, Bethesda, MD 20892, USA; <sup>2</sup>Division of Cancer Treatment and Diagnosis, National  
10 Cancer Institute, NIH, Bethesda, MD 20892, USA

11  
12 \*These authors contributed equally to this work

13  
14 **Running Title:** Exogenous DNA and pancreatic cancer DUOX2 expression

15 **Keywords:** cGAS, STING, dual oxidase 2, pancreatic cancer, reactive oxygen species

16 **Financial Support:** This project has been funded in whole or in part with federal funds from the  
17 National Cancer Institute, National Institutes of Health (ZIA BC011076-05), and under Contract  
18 No. HHSN261200800001E. The content of this publication does not necessarily reflect the  
19 views or policies of the Department of Health and Human Services, nor does mention of trade  
20 names, commercial products, or organizations imply endorsement by the U.S. Government.

21 **Corresponding Author:** James H. Doroshov, M.D., Division of Cancer Treatment and  
22 Diagnosis, Building 31, Room 3A-44, 31 Center Drive, National Cancer Institute, NIH,

23 Bethesda, MD 20892. Tel: +1 240-781-3320; Fax: +1 240-541-4515; E-mail address:

24 [doroshoj@mail.nih.gov](mailto:doroshoj@mail.nih.gov).

25 **Disclosure of Potential Conflicts of Interest:** The authors declare no potential conflicts of  
26 interest.

27 **Abbreviations:** DUOX2, dual oxidase 2; ROS, reactive oxygen species; PDAC, pancreatic  
28 ductal adenocarcinoma; NOX, NADPH oxidase; cyclic GMP-AMP Synthase (cGAS); Stimulator  
29 of Interferon Genes (STING)

30 **Manuscript Notes:**

31 Abstract: 195 words

32 Main text: 4493 words

33 Figures: 6

34 References: 37

35 Supplementary Information: Supplementary Methods; Supplementary Figures: 3

36

## 37 **Abstract**

38 Pro-inflammatory cytokines upregulate the expression of the H<sub>2</sub>O<sub>2</sub>-producing NADPH oxidase  
39 dual oxidase 2 (DUOX2) which, when elevated, adversely affects survival from pancreatic ductal  
40 adenocarcinoma (PDAC). Because the cGAS-STING pathway is known to initiate pro-  
41 inflammatory cytokine expression following uptake of exogenous DNA, we examined whether  
42 activation of cGAS-STING could play a role in the generation of reactive oxygen species by  
43 PDAC cells. Here, we found that a variety of exogenous DNA species markedly increased the  
44 production of cGAMP, the phosphorylation of TBK1 and IRF3, and the translocation of  
45 phosphorylated IRF3 into the nucleus, leading to a significant, IRF3-dependent enhancement of  
46 DUOX2 expression, and a significant flux of H<sub>2</sub>O<sub>2</sub> in PDAC cells. However, unlike the  
47 canonical cGAS-STING pathway, DNA-related DUOX2 upregulation was not mediated by NF-  
48  $\kappa$ B; and although exogenous IFN- $\beta$  significantly increased Stat1/2-associated DUOX2  
49 expression, intracellular IFN- $\beta$  signaling that followed cGAMP or DNA exposure did not itself  
50 increase DUOX2 levels. Finally, DUOX2 upregulation subsequent to cGAS-STING activation  
51 was accompanied by the enhanced, normoxic expression of HIF-1 $\alpha$  as well as DNA double  
52 strand cleavage, suggesting that cGAS-STING signaling may support the development of an  
53 oxidative, pro-angiogenic microenvironment that could contribute to the inflammation-related  
54 genetic instability of pancreatic cancer.

## 55 INTRODUCTION

56 Dual oxidase 2 (DUOX2) is an NADPH oxidase family member that plays an important  
57 role in mediating innate immunity at mucosal surfaces. Reactive oxygen species (ROS)  
58 produced by DUOX2 contribute to chronic inflammation-related tissue injury as well as  
59 angiogenesis, and can support the growth of epithelial malignancies [1-3]. DUOX2 expression is  
60 significantly increased in patients with chronic pancreatitis; furthermore, patients with repetitive  
61 bouts of pancreatic inflammation are predisposed to develop pancreatic ductal adenocarcinoma  
62 (PDAC), suggesting that DUOX2-mediated ROS could play a role in pancreatic carcinogenesis  
63 [4,5]. Our recent studies focusing on the control of DUOX2 expression have revealed that pro-  
64 inflammatory cytokines, including IFN- $\gamma$ , IL-4, and IL-17A, upregulate DUOX2 expression in  
65 pancreatic cancer cells, producing oxidative DNA damage and DNA double strand breaks that  
66 could contribute to the pathogenesis of PDAC [4,6,7].

67 The cGAS-STING (cyclic GMP-AMP Synthase [cGAS]; Stimulator of Interferon Genes  
68 [STING]) signaling axis has been shown to play a vital role in innate immunity, protecting the  
69 host from viral infection. This signaling axis has also been demonstrated to both promote cancer  
70 progression and oncogenesis, as well as to enhance antitumor immunity [8-11]. Intratumoral  
71 injection of cyclic GMP-AMP (cGAMP) in murine cancer models produces an accumulation of  
72 macrophages in the microenvironment of various malignancies such as breast cancer, melanoma,  
73 and colon cancer which subsequently leads to the recruitment of CD8<sup>+</sup> T cells that secrete a  
74 variety of pro-inflammatory cytokines (TNF- $\alpha$ , IFN- $\beta$ ) [11]. However, activation of the cGAS-  
75 STING pathway has also been demonstrated to stimulate carcinogenesis, in part by supporting an  
76 immunosuppressive and pro-metastatic microenvironment [12] as well as suppressing DNA  
77 repair [9].

78           The cytosolic DNA sensor cGAS detects and binds double-stranded DNA (dsDNA) that  
79 is ~90 bp in length and longer [13] in a sequence-independent fashion. It then catalyzes the  
80 formation of cGAMP from GTP and ATP [14,15]. cGAMP in turn binds to the ER-bound  
81 protein STING which translocates to the Golgi and recruits Tank-binding kinase 1 (TBK1) and  
82 Interferon regulatory factor 3 (IRF3). Subsequently, TBK1 phosphorylates itself as well as IRF3  
83 [16]. Phosphorylated IRF3 can then translocate into the nucleus along with NF- $\kappa$ B to promote  
84 the transcription of Type I Interferons (IFN) [14,17,18].

85           cGAS-STING appears to be involved in both the initiation and progression phases of  
86 PDAC [19,20]. Activation of STING signaling and enhancement of pancreatic inflammation  
87 was demonstrated in a murine model of pancreatitis. Zhao and colleagues found that DNA  
88 released by necrotic pancreatic acinar cells was taken up by phagocytes in the microenvironment  
89 and activated STING signaling and production of Type 1 IFN [21].

90           The importance of the pancreatic tumor microbiome for oncogenesis, cancer progression,  
91 and patient outcomes has recently been demonstrated [22,23]. Enrichment of certain microbes in  
92 the pancreatic tumor microbiome can contribute to pro-cancer phenotypes, depending on the type  
93 and genus of microbe involved. In murine models, gram-negative bacteria can traverse the  
94 intestine to reside in the normal pancreas; and in certain patients with PDAC, translocation of  
95 gram-negative *Proteobacteria* from the gut to the pancreas drives immune suppression and  
96 disease progression [22].

97           The mechanisms by which microbes or DNA released from necrotic cells into the  
98 microenvironment affect pancreatic cancer cells at the molecular level remain elusive despite  
99 increasing knowledge about the influential role that the pancreatic tumor microbiome plays in  
100 the severity and outcome of PDAC [24]. In this study, we report that uptake of exogenous DNA

101 into the cytosol induced measurable levels of cGAMP synthesis and significantly enhanced  
102 DUOX2 expression at both the mRNA and protein levels in a panel of human PDAC cell lines  
103 following the activation of cGAS-STING signaling. Importantly, exposure to exogenous  
104 cGAMP as well as siRNA knockdown of cGAS confirmed the requirement for cGAS expression  
105 and enzymatic function in DNA-mediated enhancement of DUOX2 expression. Notably, cGAS-  
106 STING-mediated enhancement of DUOX2 expression was also associated with an increase in  
107 normoxic HIF-1 $\alpha$  expression, H<sub>2</sub>O<sub>2</sub> formation, and the production of DNA double strand breaks  
108 in PDAC cells. Consistent with the known deregulation of STING signaling in colon cancer  
109 [25], DUOX2 expression was not enhanced by exogenous DNA in human colon cancer cell  
110 lines, suggesting that the crosstalk between cGAS-STING signaling and DUOX2 is context  
111 dependent for tumors of the gastrointestinal tract.

112 In summary, these data suggest that extracellular DNA of mammalian or bacterial origin,  
113 by activating the cGAS-STING pathway, could support a DUOX2-induced, H<sub>2</sub>O<sub>2</sub>-mediated pro-  
114 inflammatory milieu that produces DNA double strand breaks which may contribute to the  
115 pathogenesis of PDAC.

## 116 **RESULTS**

### 117 **Exogenous DNA activates cGAS-STING signaling and enhances DUOX2 expression in** 118 **human pancreatic cancer cells**

119 Uptake of DNA into cell cytosol from either necrotic cell debris, the formation of micronuclei  
120 due to DNA damage, or pathogens is common in areas of inflammatory tissue injury or abnormal  
121 tissue growth, such as in the tumor microenvironment [24]. Because recent studies from our  
122 laboratory have demonstrated the potential of pro-inflammatory cytokines to enhance oxidative  
123 stress in pancreatic ductal adenocarcinoma (PDAC) cells [7], we examined the effects of  
124 exogenous DNA on the NADPH oxidase family member that is prevalent in PDAC cells,  
125 DUOX2. We first evaluated the expression of STING and cGAS in PDAC cell lines that we  
126 have previously examined for their response to cytokines; we found that BxPC-3 and CFPAC-1  
127 cells express both STING and cGAS protein in amounts that are easily demonstrable, whereas  
128 STING protein expression is limited in the AsPC-1 line (Fig. 1A). DUOX2 mRNA expression is  
129 significantly enhanced in BxPC-3, CFPAC-1, and HTB134 cells 48 h following transfection of  
130 exogenous DNA into cytosol (Fig. 1B, C, D). For the CFPAC-1 and HTB134 cell lines, the  
131 effect of transfected DNA plasmids is similar to the effects of exposure to the pro-inflammatory  
132 cytokines IL-17A or IL-4 for 24 h, respectively. As demonstrated in Fig. 1E, DNA plasmid  
133 increases the protein expression of DUOX 48 h after transfection; upregulation of DUOX occurs  
134 concomitant with the phosphorylation of TBK1 and IRF3. The enhanced DUOX level is also  
135 associated with increased expression of HIF-1 $\alpha$  and the presence of DNA double strand scission  
136 in BxPC-3 cells as measured by the production of  $\gamma$ H2AX. We found that total IRF3 and STING  
137 expression were diminished following plasmid transfection, an observation that is consistent with  
138 previous studies describing the degradation of IRF3 after sustained activation of cGAS-STING

139 signaling [21,26-28]. On the other hand, an increase in DUOX expression produced by exposure  
140 to IFN- $\gamma$  for 24 h was, as expected, accompanied by a strong Stat1 phosphorylation signal  
141 without activation of TBK1 or IRF3.

142 To confirm these results, we evaluated the time-dependent activation of cGAS-STING  
143 signaling in a second PDAC cell line, CFPAC-1 (Fig. 1F). In these experiments, plasmid-related  
144 activation of the cGAS-STING pathway was demonstrable as early as 6 h following transfection,  
145 as shown by phosphorylation of TBK1 and IRF3; DUOX expression was also increased 6 h  
146 following plasmid exposure and was accompanied by evidence of enhanced DNA double strand  
147 breakage. We also found that treatment with IFN- $\beta$  for 24 h upregulated DUOX expression as  
148 well as phosphorylation of Stat1 and Stat2 and the expression of IRF1 and  $\gamma$ H2AX.

149 To evaluate the specificity of our results with human PDAC cells, we examined the effect  
150 of exogenous DNA on NADPH oxidase expression in human colon cancer cell lines  
151 (Supplementary Fig. S1). Transfection of plasmid DNA had no significant effect on either  
152 NOX1 or DUOX2 expression in the Ls513 line, nor on DUOX2 mRNA expression in either T84  
153 or HT-29 colon cancer cells. However, in the same cell lines, proinflammatory cytokine  
154 exposure significantly increased DUOX2 mRNA levels (Supplementary Fig. S1A, B, C). In a  
155 previous study, double stranded DNA was found to produce a limited effect on type I IFN  
156 production by the HT-29 cell line [25]. Taken together, these data suggest that the presence of  
157 intracellular DNA activates cGAS-STING signaling and induces DUOX2 expression primarily  
158 in pancreatic rather than colon cancer cells.

159

160 **Concentration- and time-dependent enhancement of DUOX expression following DNA**  
161 **transfection is associated with increased H<sub>2</sub>O<sub>2</sub> production by PDAC cells**



162 Next, we examined the effect of DNA concentration and time following transfection on the  
163 expression of DUOX in PDAC cells. A plasmid level as low as 500 ng DNA significantly  
164 increased DUOX2 mRNA expression 48 h after transfection of BxPC-3 cells ( $P < 0.01$ , left  
165 panel, Fig. 2A). The same amount of DNA increased TBK1 phosphorylation and DUOX protein  
166 expression (middle panel, Fig. 2A). DNA-dependent upregulation of DUOX2 mRNA expression  
167 was significantly increased as early as 3 h following transfection in CFPAC-1 cells ( $P < 0.01$ ,  
168 right panel, Fig. 2A). Transfection reagent alone in the absence of DNA produced no effect on  
169 the expression of DUOX2 (Fig. 2A, left and right panel). The upregulation of DUOX2 in BxPC-  
170 3 cells by DNA leads to the expression of a fully functional NADPH oxidase as shown in Fig.  
171 2B. Forty-eight hours following plasmid transfection, BxPC-3 cells produce significantly higher  
172 levels of extracellular H<sub>2</sub>O<sub>2</sub> (compared to solvent-treated control cells) as measured by the  
173 Amplex Red<sup>®</sup> assay,  $P < 0.05$ . For comparative purposes, the rate of H<sub>2</sub>O<sub>2</sub> production by BxPC-  
174 3 cells exposed for 24 h to IL-4 is also shown; results are consistent with the effect of IL-4 on  
175 DUOX2 expression and H<sub>2</sub>O<sub>2</sub> production by BxPC-3 cells that we have demonstrated previously  
176 [7].

177 Because of the recent demonstration that gram-negative bacteria are found in both human  
178 and murine pancreatic cancers [22], we compared the effect of plasmid DNA to that of *E. coli* for  
179 the ability to induce DUOX2 expression in PDAC cell lines (Fig. 2C). *E. coli* DNA significantly  
180 increased DUOX2 and DUOXA2 levels in BxPC-3 cells to the same degree as plasmid DNA,  $P$   
181  $< 0.05$ ; DUOX1 mRNA expression was also significantly increased but to a much smaller  
182 degree. In CFPAC-1 cells, DUOX2 expression was enhanced similarly by both plasmid and *E.*  
183 *coli* DNA. The western blot shown in Fig. 2D confirms that transfection of bacterial DNA into  
184 BxPC-3 cells activates the cGAS-STING pathway and enhances the expression of DUOX, HIF-

185  $1\alpha$ , and  $\gamma$ H2AX. Finally, in contrast to our findings for DUOX1 and DUOX2, we observed that  
186 transfection of either pGL3-BV plasmid or E. coli DNA into BxPC-3 cells did not increase the  
187 mRNA expression of either NOX1 or NOX4 (data not shown).

188

### 189 **Role of specific components of the cGAS-STING pathway in the upregulation of DUOX2** 190 **expression by exogenous DNA**

191 Using siRNAs against cGAS, we found that the enhanced expression of DUOX2 following  
192 plasmid transfection could be significantly decreased in BxPC-3 cells when cGAS expression  
193 was diminished (Fig. 3A). cGAS siRNA blocked plasmid-stimulated DUOX protein expression,  
194 phosphorylation of TBK1 and IRF3, as well as expression of cGAS itself in these cells (Fig. 3B).  
195 Since cGAS binds to and is activated by double stranded DNA to produce cGAMP, we examined  
196 by ELISA whether pGL3-BV plasmid altered cGAMP levels in a concentration-dependent  
197 fashion 48 h following transfection. A positive linear relationship could be demonstrated  
198 between intracellular cGAMP levels and plasmid DNA, with an  $R^2$  of 0.94 for the BxPC-3 line  
199 (Fig. 3C). We also found using 2  $\mu$ g of pGL3-BV DNA that the time course of cGAMP  
200 production following plasmid transfection rose linearly to  $\approx$  125 pg/ml for the first 8 h and then  
201 began to plateau for the subsequent 40 h of observation (data not shown). Because of the effect  
202 of transfected DNA on intracellular cGAMP levels in BxPC-3 cells, we examined whether  
203 exposure to extracellular cGAMP, which can be imported by tumor cells [29,30], altered  
204 DUOX2 mRNA expression. As shown in Fig. 3D, exposure of BxPC-3 cells for 24 h to  
205 extracellular cGAMP at a concentration of 25  $\mu$ g/ml significantly increased DUOX2 mRNA  
206 expression,  $P < 0.05$ . This effect was time dependent, reaching significance following a 6 h  
207 exposure to 25  $\mu$ g/ml cGAMP, left panel of Fig. 3E; cGAMP exposure also significantly

208 increased IFN- $\beta$  expression in BxPC-3 cells within 3 h, right panel of Fig. 3E. The time course  
209 for cGAMP-enhanced cGAS-STING signaling is shown in Fig. 3F; while increased DUOX  
210 protein expression is observed 24 h following cGAMP exposure, activation of TBK1 and IRF3  
211 occur as early as 1 h following the addition of cGAMP, and evidence of IFN- $\beta$ -related signal  
212 transduction (phosphorylation of Stat1 and Stat2 and increased expression of IRF9) can be  
213 demonstrated within 3 h. These experiments suggest that the cGAS-STING pathway, including  
214 upregulation of IFN- $\beta$ -related signaling, is activated following the engagement/activation of  
215 cGAS by double stranded DNA in BxPC-3 cells. However, as shown in Fig. 3G, when  
216 examined concurrently, both the time course and the degree of IFN- $\beta$ -related Stat  
217 phosphorylation differ when the effect of the exogenous type I interferon is compared to cGAMP  
218 treatment; IFN- $\beta$  activates Stat1/2 within 1 h of cytokine exposure, and activation lasts for at  
219 least 24 h; whereas, treatment with cGAMP appears to activate Stat signaling to a lesser degree  
220 and for a shorter duration.

221

### 222 **Signal transduction downstream of activated cGAS-STING in PDAC cell lines**

223 To examine cGAS-STING-dependent signaling in PDAC cells without transfecting DNA, we  
224 evaluated the effects of the STING agonist MSA-2 [31] on the events downstream of cGAS that  
225 may contribute to enhanced DUOX expression. MSA-2 treatment, similar to plasmid DNA,  
226 increases the expression of DUOX in a time-dependent fashion in BxPC-3 cells; increased  
227 DUOX expression is preceded by phosphorylation of TBK1 and IRF3 beginning 1 h following  
228 drug exposure (Fig. 4A). DNA double strand breakage occurs in concert with increased DUOX  
229 expression, while phosphorylation of Stat1 and Stat2, suggestive of IFN- $\beta$  signaling, are  
230 demonstrable 6 h following initiation of MSA-2 exposure. On the other hand, for AsPC-1 cells,

231 which demonstrate more modest baseline expression of STING compared to BxPC-3 cells (Fig.  
232 1A and Fig. 4A), MSA-2 failed to activate IRF3 or Stat transcription factors and did not increase  
233 DUOX expression. Significant enhancement of DUOX2 expression by MSA-2 is concentration  
234 dependent in both BxPC-3 (Supplementary Fig. S2A) and CFPAC-1 (Supplementary Fig. S2B)  
235 cells; furthermore, the time course of MSA-2 activation of cGAS-STING signaling resembles  
236 that produced by exposure to cGAMP, differing only in the modest activation of Stat2 by the  
237 STING agonist (Supplementary Fig. S2C). Finally, because we previously demonstrated that  
238 dexamethasone co-treatment blunts pro-inflammatory cytokine-related upregulation of DUOX  
239 [32], we evaluated the effect of the glucocorticoid on signal transduction following cGAMP and  
240 MSA-2 exposure. Dexamethasone treatment partially blocks DUOX upregulation by either  
241 agent, as well as DNA double strand breakage, and cGAS-STING-mediated phosphorylation of  
242 IRF3 and TBK1 (Supplementary Fig. S2D).

243 We next examined the nuclear translocation of IRF3 and phospho-IRF3, p65, Stat1 and  
244 Stat2 following MSA-2 treatment in PDAC cell lines (Fig. 4B). Nuclear translocation of  
245 phosphorylated IRF3 by 6 h was clear for both BxPC-3 and CFPAC-1 but not AsPC-1 cells.  
246 However, translocation of the NF- $\kappa$ B component p65 (RELA) following MSA-2 exposure was  
247 not prominent in any PDAC cell line. To broaden our evaluation of nuclear signaling, we  
248 compared the effects of IFN- $\beta$ , IL-17A, cGAMP, and MSA-2 on pathways downstream of  
249 cGAS-STING in BxPC-3 cells (Fig. 4C). As expected, IFN- $\beta$  activates Stat1 and Stat2 and  
250 increases the expression of IRF9. Furthermore, exposure to both cGAMP and MSA-2 leads to  
251 the nuclear translocation of phosphorylated IRF3. However, only IL-17A treatment modestly  
252 increases the expression of p65 in the nucleus.

253 To explore the role of NF- $\kappa$ B signaling further, the effect of RELA siRNA on DUOX  
254 expression was studied in BxPC-3 cells. Despite > 75% knockdown of RELA mRNA  
255 expression (Fig. 4D, left panel), siRNA treatment did not decrease cGAMP-mediated  
256 upregulation of DUOX2 (Fig. 4D, right panel). On the other hand, the increase in DUOX2 levels  
257 produced by IL-17A, that we have previously shown to be regulated, in part, by NF- $\kappa$ B [7], was  
258 significantly decreased by RELA siRNA,  $P < 0.05$ . RELA siRNAs also did not diminish the  
259 significantly enhanced DUOX2 expression that occurred 48 h following plasmid transfection  
260 (Fig. 4E).

261

262 **IRF3, but not Stat1 or Stat2, plays an important role in cGAS-STING-mediated**  
263 **enhancement of DUOX2 expression**

264 To further elucidate the mechanism by which exogenous DNA mediates increased DUOX2  
265 expression following activation of cGAS-STING signaling, we employed an siRNA knockdown  
266 strategy. Knockdown of IRF3 expression in BxPC-3 by ~50% (Fig. 5A, right panel)  
267 significantly decreased DNA-mediated DUOX2 mRNA expression relative to a scrambled  
268 siRNA control (Fig. 5A, left panel). On the other hand, siRNA knockdown of IRF1 did not alter  
269 DNA-mediated DUOX2 expression (Fig. 5A, left and middle panels; Supplementary Fig. S3G).  
270 These results were confirmed for MSA-2-mediated, as well as plasmid-mediated, DUOX2  
271 expression using three different IRF3 siRNAs (Fig. 5B and 5C). Experiments evaluating  
272 CFPAC-1 cells exposed to cGAMP demonstrated similar results, confirming the role of IRF3 in  
273 cGAS-STING-mediated DUOX2 expression (data not shown). At the protein level, knockdown  
274 of IRF-3 with two different siRNAs markedly diminished plasmid-enhanced DUOX and HIF-1 $\alpha$   
275 expression in the BxPC-3 cell line (Fig. 5D).

276           Because we had demonstrated in these studies that DUOX2 expression is significantly  
277   enhanced when PDAC cells are treated with IFN- $\beta$  (Fig. 3E), and that Stat signaling pathways  
278   that are downstream of IFN- $\beta$  are activated by cGAMP and MSA-2 (Fig.4C), we examined the  
279   role of Stat signaling in DNA-mediated upregulation of DUOX2 (Supplementary Fig. S3). As  
280   shown in Supplementary Fig. S3A and Supplementary Fig. S3B, transfection of plasmid DNA  
281   into BxPC-3 cells significantly increases DUOX2 expression; however, knockdown of either  
282   Stat1 or Stat2 with siRNA does not alter DNA-enhanced upregulation of DUOX2 mRNA  
283   expression. Furthermore, while Stat2 knockdown blocks IFN- $\beta$ -stimulated DUOX2 expression,  
284   at least in part, it does not inhibit MSA-2-related upregulation of DUOX2 (Supplementary Fig.  
285   S3C, left panel). These results were confirmed for IFN- $\beta$ , using multiple Stat2 siRNAs  
286   (Supplementary Fig. S3D). Finally, the ineffectiveness of Stat2 knockdown on MSA-2-related  
287   upregulation of DUOX2 expression was confirmed for plasmid DNA- and cGAMP-enhancement  
288   of DUOX2 expression using multiple siRNAs (Supplementary Fig. S3E and Supplementary Fig.  
289   S3F).

290

291

292

293

294

295

296

## 297 **DISCUSSION**

298 In a recent study, our laboratory demonstrated that high level DUOX2 expression is adversely  
299 correlated with survival in patients with PDAC and that T<sub>H</sub>2 and T<sub>H</sub>17 cytokines synergistically  
300 induce expression of DUOX2 in PDAC cell lines [7]. These experiments broadened the known  
301 range of pro-inflammatory cytokines, beyond IFN- $\gamma$  and LPS, capable of enhancing DUOX2  
302 expression and DUOX2-mediated H<sub>2</sub>O<sub>2</sub> production in pancreatic cancer cells [33]. Because the  
303 cGAS-STING pathway plays an important role in the regulation of pro-inflammatory cytokine  
304 expression [34] and is known to be highly expressed in both human PDACs and in murine  
305 pancreatic cancer models [35], we examined whether a relationship might exist between cGAS-  
306 STING signaling and DUOX2 expression.

307 The demonstration that exogenous DNA from plasmids or bacterial sources significantly  
308 enhanced DUOX2 expression and function in a panel of PDAC cell lines in a concentration- and  
309 time-dependent fashion initially suggested that the canonical cGAS-STING pathway was  
310 operating in our studies (Fig. 6). Uptake of exogenous DNA led to the formation of cGAMP, the  
311 phosphorylation of TBK1 and IRF3, and the translocation of phosphorylated IRF3 to the nucleus  
312 of PDAC cells. These results were confirmed by exposure to exogenous cGAMP as well as by  
313 treatment with the STING agonist MSA-2 (Fig. 3D and 3E; Suppl. Fig. S2). Furthermore, cGAS  
314 siRNAs significantly diminished both cGAS expression and upregulation of DUOX2 by a DNA  
315 plasmid. We also found using multiple siRNAs that IRF3, and not IRF1, is necessary for DNA-  
316 mediated induction of DUOX2 expression (Fig. 5).

317 However, while exogenous DNA activated cGAS-STING signaling and generated  
318 cGAMP, activation of NF- $\kappa$ B with translocation to the nucleus was not demonstrated following  
319 cGAMP exposure; furthermore, although RELA siRNA partially inhibited the upregulation of

320 DUOX2 by IL-17A (consistent with our prior experiments demonstrating the NF- $\kappa$ B-dependence  
321 of this effect), multiple RELA siRNAs did not alter either plasmid- or cGAMP-mediated  
322 enhancement of DUOX2 expression (Figs. 4D and 4E). The observation that siRNA knockdown  
323 of NF- $\kappa$ B does not appear to have a significant effect on DNA-mediated DUOX2 expression  
324 suggests that the mechanism that underlies the upregulation of DUOX2 by cGAS-STING  
325 diverges, in part, from the canonical pathway.

326 Moreover, we demonstrated for the first time that exposure to the pro-inflammatory  
327 cytokine IFN- $\beta$  strongly upregulates DUOX2 expression in PDAC cells. DUOX2 upregulation  
328 by IFN- $\beta$  was accompanied by increased expression of IRF-9, as well as phosphorylation of  
329 Stat1 and Stat2. This effect of IFN- $\beta$  on DUOX2 expression might have been expected because  
330 of our previous demonstration that IFN- $\gamma$ -mediated upregulation of DUOX2 is produced by Stat1  
331 binding to the DUOX2 promoter [33]. However, despite the cGAMP-mediated increase in IFN-  
332  $\beta$  expression that we observed (Fig. 3E), siRNAs against Stat1 and Stat2, although capable of  
333 blocking enhanced DUOX2 expression produced by IFN- $\beta$ , did not inhibit MSA-2- or plasmid-  
334 mediated increases in DUOX2 levels (Suppl. Fig. S3). Thus, although the cGAS-STING  
335 pathway appears capable of regulating IFN- $\beta$  transcription in PDAC cells, signaling by  
336 intrinsically-produced IFN- $\beta$  does not appear to explain enhanced DUOX2 expression following  
337 the uptake of exogenous DNA.

338 In conclusion, our findings identify a novel crosstalk between the cGAS-STING immune  
339 sensing pathway and NADPH oxidase expression, both of which are implicated in mediating  
340 innate immunity at mucosal surfaces and in cancer progression. Since cGAS-STING-related  
341 enhancement of DUOX2 levels (and subsequent H<sub>2</sub>O<sub>2</sub> formation) increases the normoxic  
342 expression of HIF-1 $\alpha$  and promotes DNA double strand scission (as measured by  $\gamma$ H2AX), our



343 experiments suggest that peroxide-mediated DNA oxidation and double strand breaks occurring  
344 downstream of DUOX2 [7] might provide a feedback mechanism that could sustain cGAS-  
345 STING activation [36]. Such a process may contribute to oxidant-related pancreatic  
346 carcinogenesis stimulated by extracellular DNA present in a pro-inflammatory pancreatic  
347 microenvironment.

348

349

350

351

352

353

354

355

356

357

358

359

## 360 **MATERIALS AND METHODS**

### 361 **Cell culture, antibodies, and reagents**

362 All cell lines, culture conditions, antibodies, plasmids, primers, and reagents are described in  
363 Supplementary Methods.

364

### 365 **Western analysis**

366 Tumor cells ( $4 \times 10^6$ ) were plated in 100 mm dishes (Corning) and harvested after treatment or  
367 transfection. Cell lines were washed once with ice-cold PBS (1X), followed by scraping in PBS,  
368 collection into 1.7 ml microcentrifuge tubes, and centrifuged at 5,000 rpm for 2 min at 4 °C.  
369 Supernatant was aspirated, and cell pellets were frozen at -80 °C. Cell pellets were lysed and  
370 resuspended in 1X RIPA lysis buffer (Millipore Sigma) supplemented with 1X cOmplete  
371 Protease Inhibitor Cocktail (Roche) and PhosSTOP phosphatase inhibitors (Roche). Lysates  
372 were incubated on ice for 10 min and subsequently centrifuged at 14,000 x g for 10 min at 4 °C;  
373 the supernatant was evaluated for protein content using a Pierce BCA Protein Assay  
374 (ThermoFisher Scientific). In all experiments, 50 µg protein was loaded onto Novex™ 4-20%  
375 Tris-Glycine Mini Gels (ThermoFisher Scientific), transferred to nitrocellulose membranes with  
376 the iBlot™ 2 Gel Transfer Device (ThermoFisher Scientific), and probed with the specified  
377 antibodies overnight at 4 °C in 1X TBS-Tween (Tris-buffered saline plus 0.02% Tween 20)  
378 containing 5% non-fat milk. Immunoblots were visualized using either a LICOR Odyssey Fc  
379 imaging instrument or by development with HyBlot CL Autoradiography Film (Thomas  
380 Scientific).

381

### 382 **Quantitative real-time PCR (Q-PCR)**

383 For real-time PCR experiments, total RNA was extracted from  $1 \times 10^6$  cells using the QIAGEN  
384 RNeasy Mini Kit (74104) following the manufacturer's instructions. Two micrograms of total  
385 RNA were used for cDNA synthesis in a 20  $\mu$ l reaction. The cDNA synthesis steps consisted  
386 first of a 5 min incubation at 65 °C of the hexameric random primers, dNTP, and RNA, followed  
387 by cycles of 25 °C for 10 min, 42 °C for 50 min, and 75 °C for 10 min with the addition of 0.1 M  
388 DTT, 5X Reaction Buffer, SuperScript III Reverse Transcriptase (18080-044), and RNaseOUT  
389 inhibitor (all from Life Technologies). The synthesized cDNA was diluted to 100  $\mu$ l with  
390 molecular grade H<sub>2</sub>O, and quantitative PCR was conducted in 384-well plates in a 20  $\mu$ l volume  
391 consisting of 2  $\mu$ l diluted cDNA, 1  $\mu$ l primers, 7  $\mu$ l H<sub>2</sub>O, and 10  $\mu$ l TaqMan Universal PCR  
392 Master Mix (4364340; Life Technologies). The PCR was performed using the default cycling  
393 conditions (50 °C for 2 min and 95 °C for 10 min, and 40 cycles of 95 °C for 15 s and 60 °C for  
394 10 min) with the ABI QuantStudio 6 Flex Real-Time PCR System (Applied Biosystems).  
395 Triplicate samples were used for the Q-PCR, and the mean values were calculated. The data in  
396 all figures represent three independent experiments. Relative gene expression was calculated  
397 from the ratio of the target gene expression to the expression of the internal reference gene ( $\beta$ -  
398 actin) based on the cycle threshold values.

399

#### 400 **Transfection and siRNA knockdown**

401 Lonza Kit V (VCA-1003) was used for electroporation of BxPC-3 cells with the Lonza  
402 Nucleofector 2b device (Cat# AAB-1001). For this line,  $1 \times 10^6$  cells were resuspended in the  
403 electroporation solution provided in the kit, per the manufacturer's recommendations, and 2  $\mu$ g  
404 of DNA was added to the cell suspension before transferring to a clean electroporation cuvette.  
405 This ratio of cells to DNA was maintained when scaling up experiments for immunoblot

406 analysis. After the electric charge was applied, the cells were transferred with a transfer pipette  
407 to culture dishes containing full-serum and media. The cell-type specific program was used for  
408 the electroporation procedure. Lipofectamine RNAiMAX reagents (Thermo Fisher Scientific,  
409 Cat# 13778075) was used to transfect siRNA into CFPAC-1 cells following the manufacturer's  
410 protocol. Lipofectamine 2000 (Thermo Fisher Scientific, Cat# 11668027) was used to transfect  
411 plasmid DNA into CFPAC-1, HT-29, and HTB134 cells. Purified E. coli genomic DNA  
412 fragments around 1000 bp in size were transfected into both BxPC-3 and CFPAC-1 cells using  
413 Lipofectamine 2000 according to the manufacturer's protocols.

414 Lonza Kit V (VCA-1003) was also used for co-electroporation of siRNA and DNA into  
415 BxPC-3 cells with the Lonza Nucleofector 2b device for 48 h. 20nM of scrambled siRNA or  
416 target gene siRNAs as indicated in the figures were used for co-transfection experiments when  
417 siRNA and plasmid DNA were simultaneously co-transfected.

418

#### 419 **ELISA**

420 The cGAMP ELISA kit was purchased from Cayman Chemical (cat# 501700), and the  
421 manufacturer's protocol was followed. Absorbance was quantitated at a wavelength of 450 nm  
422 using a plate reader. Triplicate studies were performed for each experimental condition, and  
423 means were determined for graphical presentation.

424

#### 425 **Amplex Red<sup>®</sup> assay to detect extracellular H<sub>2</sub>O<sub>2</sub>**

426 The Amplex Red<sup>®</sup> Hydrogen Peroxide/Peroxidase Assay Kit (cat# A22188; Life Technologies)  
427 was used to detect extracellular H<sub>2</sub>O<sub>2</sub> generation. BxPC-3 cells were either transfected with 2 µg  
428 of pGL3-BV plasmid for 48 h or treated with IL-4 (50 ng/ml) for 24 h and then washed twice

429 with 1 X PBS, trypsinized, and counted.  $2 \times 10^4$  live cells in 20  $\mu$ l of 1X Krebs-Ringer  
430 phosphate glucose [KRPG] buffer was mixed with 100  $\mu$ l of a solution containing 50  $\mu$ M  
431 Amplex Red<sup>®</sup> and 0.1 U/ml horse radish peroxidase in KRPG buffer plus 1  $\mu$ M ionomycin and  
432 then incubated at 37 °C for the indicated times. The fluorescence of the oxidized 10-acetyl-3,7-  
433 dihydroxyphenoxazine was then measured at excitation and emission wavelengths of 530 nm and  
434 590 nm, respectively, using a SpectraMax Multi-Mode Microplate Reader (Molecular Devices,  
435 Sunnyvale, CA, USA); the amount of extracellular H<sub>2</sub>O<sub>2</sub> was calculated based on a standard  
436 curve using 0-2  $\mu$ M H<sub>2</sub>O<sub>2</sub>. Each value in the figures is the mean value of quadruplicate samples.

437

#### 438 **Quantification and statistical analysis**

439 Data are displayed as the mean  $\pm$  SD from at least triplicate experiments, unless otherwise  
440 specified. Comparisons between two groups were analyzed using the Student's *t*-test, whereas  
441 comparisons between multiple groups were performed via ANOVA. Statistical significance was  
442 determined as a *P* value  $< 0.05$  and shown with an asterisk (\*); a *P* value  $< 0.01$  is represented  
443 with three asterisks (\*\*\*)).

444

445

## 446 REFERENCES

447

- 448 1. Wu Y, Antony S, Meitzler JL, Doroshow JH. Molecular mechanisms underlying chronic  
449 inflammation-associated cancers. *Cancer Lett.* 2014;345:164-173.
- 450 2. Aviello G, Knaus UG. NADPH oxidases and ROS signaling in the gastrointestinal tract.  
451 *Mucosal Immunol.* 2018;11:1011-1023.
- 452 3. De Deken X, Corvilain B, Dumont JE, Miot F. Roles of DUOX-mediated hydrogen peroxide  
453 in metabolism, host defense, and signaling. *Antioxid Redox Signal.* 2014;20:2776-2793.
- 454 4. Wu Y, Lu J, Antony S, Juhasz A, Liu H, Jiang G et al. Interferon-gamma-induced toll-like  
455 receptor 4 is required for the synergistic induction of dual oxidase 2 and dual oxidase A2 by  
456 lipopolysaccharide and interferon-gamma in human pancreatic cancer cell lines. *J Immunol.*  
457 2013;190:1859-1872.
- 458 5. Cheung EC, DeNicola GM, Nixon C, Blyth K, Labuschagne CF, Tuveson DA et al. Dynamic  
459 ROS Control by TIGAR Regulates the Initiation and Progression of Pancreatic Cancer. *Cancer*  
460 *Cell.* 2020;37:168-182.
- 461 6. Wu Y, Meitzler JL, Antony S, Juhasz A, Lu J, Jiang G et al. Dual Oxidase2 and pancreatic  
462 adenocarcinoma: IFN-gamma-mediated dual oxidase2 overexpression results in H<sub>2</sub>O<sub>2</sub>-induced,  
463 ERK-associated up-regulation of HIF-1a and VEGF-A. *Oncotarget.* 2016;7:68412-68433.
- 464 7. Wu Y, Konate MM, Lu J, Makhoul H, Chuaqui R, Antony S et al. IL-4 and IL-17A  
465 cooperatively promote hydrogen peroxide production, oxidative DNA damage, and upregulation  
466 of dual oxidase 2 in human colon and pancreatic cancer cells. *J Immunol.* 2019;203:2532-2544.
- 467 8. Ahn J, Xia T, Konno H, Konno K, Ruiz P, Barber GN. Inflammation-driven carcinogenesis is  
468 mediated through STING. *Nat Commun.* 2014;5:5166.

- 469 9. Liu H, Zhang H, Wu X, Ma D, Wu J, Wang L et al. Nuclear cGAS suppresses DNA repair and  
470 promotes tumorigenesis. *Nature*. 2018;563:131-136.
- 471 10. Corrales L, Glickman LH, McWhirter SM, Kanne DB, Sivick KE, Katibah GE et al. Direct  
472 activation of STING in the tumor microenvironment leads to potent and systemic tumor  
473 regression and immunity. *Cell Rep*. 2015;11:1018-1030.
- 474 11. Ohkuri T, Kosaka A, Ishibashi K, Kumai T, Hirata Y, Ohara K et al. Intratumoral  
475 administration of cGAMP transiently accumulates potent macrophages for anti-tumor immunity  
476 at a mouse tumor site. *Cancer Immunol Immunother*. 2017;66:705-716.
- 477 12. Zheng Z, Jia S, Shao C, Shi Y. Irradiation induces cancer lung metastasis through activation  
478 of the cGAS-STING-CCL5 pathway in mesenchymal stromal cells. *Cell Death Dis*.  
479 2020;11:326.
- 480 13. Luecke S, Holleufer A, Christensen MH, Jonsson KL, Boni GA, Sorensen LK et al. cGAS is  
481 activated by DNA in a length-dependent manner. *EMBO Rep*. 2017;18:1707-1715.
- 482 14. Sun L, Wu J, Du F, Chen X, Chen ZJ. Cyclic GMP-AMP synthase is a cytosolic DNA sensor  
483 that activates the type I interferon pathway. *Science*. 2013;339:786-791.
- 484 15. Wu J, Sun L, Chen X, Du F, Shi H, Chen C et al. Cyclic GMP-AMP is an endogenous  
485 second messenger in innate immune signaling by cytosolic DNA. *Science*. 2013;339:826-830.
- 486 16. Tanaka Y, Chen ZJ. STING specifies IRF3 phosphorylation by TBK1 in the cytosolic DNA  
487 signaling pathway. *Sci Signal*. 2012;5:ra20.
- 488 17. Ishikawa H, Barber GN. STING is an endoplasmic reticulum adaptor that facilitates innate  
489 immune signalling. *Nature*. 2008;455:674-678.
- 490 18. Ishikawa H, Ma Z, Barber GN. STING regulates intracellular DNA-mediated, type I  
491 interferon-dependent innate immunity. *Nature*. 2009;461:788-792.

- 492 19. Fu J, Kanne DB, Leong M, Glickman LH, McWhirter SM, Lemmens E et al. STING agonist  
493 formulated cancer vaccines can cure established tumors resistant to PD-1 blockade. *Sci Transl*  
494 *Med.* 2015;7:283ra52.
- 495 20. Wang L, Shureiqi I, Stroehlein JR, Wei D. Novel and emerging innate immune therapeutic  
496 targets for pancreatic cancer. *Expert Opin Ther Targets.* 2018;22:977-981.
- 497 21. Zhao Q, Wei Y, Pandol SJ, Li L, Habtezion A. STING signaling promotes inflammation in  
498 experimental acute pancreatitis. *Gastroenterology.* 2018;154:1822-1835.
- 499 22. Pushalkar S, Hundeyin M, Daley D, Zambirinis CP, Kurz E, Mishra A et al. The pancreatic  
500 cancer microbiome promotes oncogenesis by induction of innate and adaptive immune  
501 suppression. *Cancer Discov.* 2018;8:403-416.
- 502 23. Riquelme E, Zhang Y, Zhang L, Montiel M, Zoltan M, Dong W et al. Tumor microbiome  
503 diversity and composition influence pancreatic cancer outcomes. *Cell.* 2019;178:795-806.
- 504 24. Hoong BYD, Gan YH, Liu H, Chen ES. cGAS-STING pathway in oncogenesis and cancer  
505 therapeutics. *Oncotarget.* 2020;11:2930-2955.
- 506 25. Xia T, Konno H, Ahn J, Barber GN. Deregulation of STING signaling in colorectal  
507 carcinoma constrains DNA damage responses and correlates with tumorigenesis. *Cell Rep.*  
508 2016;14:282-297.
- 509 26. Higgs R, Ni GJ, Ben LN, Breen EP, Fitzgerald KA, Jefferies CA. The E3 ubiquitin ligase  
510 Ro52 negatively regulates IFN-beta production post-pathogen recognition by polyubiquitin-  
511 mediated degradation of IRF3. *J Immunol.* 2008;181:1780-1786.
- 512 27. Long L, Deng Y, Yao F, Guan D, Feng Y, Jiang H et al. Recruitment of phosphatase PP2A  
513 by RACK1 adaptor protein deactivates transcription factor IRF3 and limits type I interferon  
514 signaling. *Immunity.* 2014;40:515-529.



- 515 28. Prabakaran T, Bodda C, Krapp C, Zhang BC, Christensen MH, Sun C et al. Attenuation of  
516 cGAS-STING signaling is mediated by a p62/SQSTM1-dependent autophagy pathway activated  
517 by TBK1. *EMBO J.* 2018;37.
- 518 29. Ritchie C, Cordova AF, Hess GT, Bassik MC, Li L. SLC19A1 is an importer of the  
519 immunotransmitter cGAMP. *Mol Cell.* 2019;75:372-381.
- 520 30. Luteijn RD, Zaver SA, Gowen BG, Wyman SK, Garelis NE, Onia L et al. SLC19A1  
521 transports immunoreactive cyclic dinucleotides. *Nature.* 2019;573:434-438.
- 522 31. Pan BS, Perera SA, Piesvaux JA, Presland JP, Schroeder GK, Cumming JN et al. An orally  
523 available non-nucleotide STING agonist with antitumor activity. *Science.* 2020;369.
- 524 32. Wu Y, Antony S, Meitzler JL, Lu J, Juhasz A, Jiang G et al. Dexamethasone suppresses  
525 cytokine-induced dual oxidase 2 (Duox2) and VEGF-A expression in human pancreatic cancer  
526 cells in vitro and pancreatic cancer growth in xenografts. *Cancer Res.* 76 (Suppl. 14), Abstract #  
527 1456; page 371. 2016.
- 528 33. Wu Y, Antony S, Juhasz A, Lu J, Ge Y, Jiang G et al. Up-regulation and sustained activation  
529 of Stat1 are essential for interferon-gamma (IFN-gamma)-induced dual oxidase 2 (Duox2) and  
530 dual oxidase A2 (DuoxA2) expression in human pancreatic cancer cell lines. *J Biol Chem.*  
531 2011;286:12245-12256.
- 532 34. Ablasser A, Chen ZJ. cGAS in action: expanding roles in immunity and inflammation.  
533 *Science.* 2019;363:DOI: 10.1126/science.aat8657.
- 534 35. Baird JR, Friedman D, Cottam B, Dubensky TW, Jr., Kanne DB, Bambina S et al.  
535 Radiotherapy combined with novel STING-targeting oligonucleotides results in regression of  
536 established tumors. *Cancer Res.* 2016;76:50-61.

537 36. Gehrke N, Mertens C, Zillinger T, Wenzel J, Bald T, Zahn S et al. Oxidative damage of  
538 DNA confers resistance to cytosolic nuclease TREX1 degradation and potentiates STING-  
539 dependent immune sensing. *Immunity*. 2013;39:482-495.

540 37. Zheng J, Mo J, Zhu T, Zhuo W, Yi Y, Hu S et al. Comprehensive elaboration of the cGAS-  
541 STING signaling axis in cancer development and immunotherapy. *Mol Cancer*. 2020;19:133.

542

## 543 **AUTHOR CONTRIBUTIONS**

544 YW, SLW and JHD conceptualized the project. SLW and YW performed the experiments and  
545 analyzed data. SLW, YW, and JHD wrote the manuscript. MK, SA, JLM, GJ, JL, ID, AJ, BD,  
546 and KR edited and approved the manuscript.

547

## 548 **COMPETING INTERESTS**

549 The authors declare no competing interests.

550

## 551 **ADDITIONAL INFORMATION**

552 **Supplementary information:** The online version contains supplementary material.

553

554 **Correspondence** and requests for materials should be addressed to James H. Doroshov, M.D.

555

## 556 **Figure Legends**

557

### 558 **Fig. 1 Introduction of exogenous DNA activates cGAS-STING signaling and enhances the**

559 **expression of DUOX2 in human pancreatic cancer cells.** **A** The protein expression levels of

560 STING and cGAS were examined in three human pancreatic cancer cell lines: A: AsPC-1; B:

561 BxPC-3; and C: CFPAC-1. **B** The effects of three different DNA plasmids on DUOX2 mRNA

562 expression in BxPC-3 cells 48 h following transfection were examined by RT-PCR and compared

563 to the effect of IFN- $\gamma$  on DUOX2 expression used here as a positive control [4]. \* $P < 0.05$ . **C**

564 DUOX2 expression in CFPAC-1 cells was determined 48 h after transfection of two DNA

565 plasmids and compared to the effect of exposing these cells to IL-17A for 24 h [7]. \* $P < 0.05$ . **D**

566 DUOX2 expression was measured by RT-PCR in HTB134 human pancreatic cancer cells 48 h

567 following plasmid transfection or after exposure to 50 ng/ml IL-4 for 24 h [7]. \* $P < 0.05$ . **E**

568 DUOX expression, cell signaling, DNA damage, and cGAS-STING activation were examined in

569 BxPC-3 cells by Western blot following exposure to pcDNA plasmid (48 h following transfection)

570 compared to the same cell line treated for 24 h with 25 ng/ml of IFN- $\gamma$ . **F** CFPAC-1 cells were

571 evaluated in these experiments to compare the time course of DUOX expression and activation of

572 the cGAS-STING pathway following transfection of a DNA plasmid or exposure to IFN- $\beta$  in

573 complete media. All of the experiments shown here were repeated at least in triplicate.

574

### 575 **Fig. 2 Concentration- and time-dependent enhancement of DUOX expression by plasmid**

576 **DNA leads to significantly increased H<sub>2</sub>O<sub>2</sub> production in PDAC cells while exogenous**

577 **bacterial DNA is as effective as plasmid DNA in stimulating cGAS-STING signaling.** **A** 48-

578 h following transfection of PGL3-BV plasmid into BxPC-3 cells DUOX expression is

579 significantly increased in a concentration-dependent fashion (left panel); enhanced DUOX  
580 expression 48 h following plasmid transfection is accompanied by phosphorylation of TBK1 and  
581 IRF3 (middle panel). Time course for plasmid-enhanced DUOX2 expression in CFPAC-1 cells  
582 propagated in complete media is shown in the right panel. \*\*\* $P < 0.01$ . **B** Time-dependent  
583 H<sub>2</sub>O<sub>2</sub> production by BxPC-3 cells was measured using the Amplex Red<sup>®</sup> assay 48 h following  
584 transfection of 2μg of pGL3-BV plasmid; the rate of H<sub>2</sub>O<sub>2</sub> formation was compared to that of  
585 solvent treated cells and to cells exposed to IL-4 for 24 h, a treatment that has been shown  
586 previously to enhance the expression of functional DUOX2. H<sub>2</sub>O<sub>2</sub> production was measured in  
587 the presence of ionomycin (1 μM). \*  $P < 0.05$ . **C** In the left and center panels, the expression of  
588 DUOX1 and DUOX2 as well as DUOXA1 and DUOXA2 were determined 48 h following  
589 transfection of a DNA plasmid or E. coli DNA (Bac-DNA) into BxPC-3 cells. \* $P < 0.05$ . The  
590 right panel demonstrates DUOX2 mRNA expression 48 h following transfection of either  
591 plasmid or E. coli DNA into CFPAC-1 cells. \* $P < 0.05$ . **D** For BxPC-3 cells, the upregulation  
592 of DUOX and the downstream effects of increased DUOX expression, including activation of  
593 HIF-1α and DNA double strand scission measured by γH2AX, were similar 48 h following  
594 transfection with either plasmid or E. coli DNA. The effects of a 24 h IFN-β exposure on DUOX  
595 expression, DNA damage, and interferon-related signaling pathways are also shown. All  
596 experimental results shown are the result of at least three independent experiments.

597

598 **Fig. 3 Role of the cGAS-STING pathway in the enhancement of DUOX2 expression by**  
599 **extracellular DNA in BxPC-3 pancreatic cancer cells. A** Effect of intracellular cGAS levels  
600 (left panel) on expression of DUOX2 (right panel) 48 h following transfection of pGL3-BV  
601 plasmid examined using cGAS siRNA in BxPC-3 cells. **B** Evaluation of the role of cGAS in

602 plasmid-enhanced DUOX protein expression and cell signaling in the BxPC-3 cell line. Western  
603 analysis was performed 48 h following plasmid and siRNA transfection. **C** DNA plasmid  
604 concentration-dependent increase in cellular cGAMP production by BxPC-3 cells. Tumor cells  
605 were transfected with increasing amounts of pGL3-BV DNA; 48 h following transfection,  
606 intracellular cGAMP was measured by ELISA.  $P < 0.05$  for all DNA levels  $\geq 500$  ng. **D**  
607 Concentration-dependent increase in DUOX2 expression following 24 h exposure to  
608 extracellular cGAMP in BxPC-3 cells.  $*P < 0.05$ . **E** Left panel; time-dependent increase in  
609 cGAMP-related DUOX2 expression in BxPC-3 cells compared to the effect of 24 h IFN- $\beta$   
610 treatment on DUOX2 mRNA levels. Right panel; effect of cGAMP exposure time on expression  
611 of IFN- $\beta$  mRNA.  $*P < 0.05$ . **F** Time course for cGAMP-related DUOX protein expression and  
612 cGAS-STING signaling. **G** Comparison of the time course of the effects of IFN- $\beta$  and cGAMP  
613 on Stat and cGAS-STING signaling, DUOX expression, and DNA damage in BxPC-3 cells. All  
614 experiments shown in this figure were repeated a minimum of three times.

615  
616 **Fig. 4 Activation of signaling pathways downstream of cGAS-STING in PDAC cell lines. A**  
617 Comparison of cell signaling and DNA damage time course following exposure to the STING  
618 agonist MSA-2 (10  $\mu$ M) in AsPC-1 and BxPC-3 cells. **B** Time course for cGAS-STING and  
619 cytokine nuclear signaling following exposure to 10  $\mu$ M MSA-2 in AsPC-1, BxP-3, and CFPAC-  
620 1 tumor cells. **C** Comparison of cGAMP/MSA-2 induced cell signaling to that produced by IFN-  
621  $\beta$  and IL-17A in BxPC-3 cells. Cells were untreated or exposed for 1 or 6 h to each of the  
622 compounds studied. **D** Effect of NF- $\kappa$ B signaling on cGAMP-related DUOX2 expression. The  
623 role of RELA expression in cGAMP- and IL-17A-related DUOX2 (right panel) and RELA (left  
624 panel) expression was examined in BxPC-3 cells using siRNA. In these experiments, control

625 siRNA and RELA siRNA, where indicated, were transfected into BxPC-3 cells; 24 h following  
626 transfection, cells were propagated in serum free medium alone or with the addition of either IL-  
627 17A or cGAMP for another 24 h. \* $P < 0.05$ . **E** Role of NF- $\kappa$ B signaling in plasmid-related  
628 upregulation of DUOX2 expression in BxPC-3 cells evaluated using two different RELA  
629 siRNAs; left panel demonstrates effects of RELA siRNAs on DUOX2 expression 48 h after  
630 plasmid transfection, and the right panel shows the effect of the siRNAs on RELA expression  
631 itself. \*\*\* $P < 0.01$ . The results presented represent at least three independent experiments.

632  
633 **Fig 5. Role of IRF3 in the control of cGAS-STING-mediated enhancement of DUOX2**  
634 **expression.** **A** The contributions of IRF1 and IRF3 to plasmid-enhanced expression of DUOX2  
635 measured using RT-PCR were examined in the BxPC-3 cell line using IRF1 or IRF3 siRNAs in  
636 the left panel, and on IRF1 or IRF3 expression levels in the middle and right panels, respectively.  
637 \*\*\* $P < 0.01$ . **B** In the left panel, the effect of IRF3 siRNAs on MSA-2-enhanced DUOX2  
638 expression was determined for BxPC-3 cells; downregulation of IRF3 by siRNAs was examined  
639 in the right panel. \* $P < 0.05$ . **C** IRF-3 siRNAs block the upregulation of DUOX2 mRNA  
640 expression following plasmid transfection (left panel) and baseline IRF3 mRNA after pGL3-BV  
641 transfection (right panel) in BxPC-3 cells. \* $P < 0.05$ . **D** At the protein level, IRF3 siRNA  
642 diminishes the enhanced expression of DUOX by the pGL3-BV plasmid in BxPC-3 pancreatic  
643 cancer cells. These results are representative of three independent experiments.

644  
645 **Fig 6. cGAS-STING-mediated enhancement of DUOX2 expression in PDAC cells.** In this  
646 model, foreign DNA, from exogenous plasmids or from bacterial sources, when transferred into  
647 human PDAC cells activates cGAS-STING signaling. After binding DNA in the cytosol, cGAS

648 catalyzes the formation of cGAMP from GTP and ATP. cGAMP in turn binds to the ER-bound  
649 protein STING which translocates to the Golgi and recruits Tank-binding kinase 1 (TBK1) and  
650 Interferon regulatory factor 3 (IRF3). The formation of this signaling complex allows TBK1 to  
651 phosphorylate IRF3 and auto-phosphorylate itself. For PDAC cells, in a non-canonical fashion,  
652 phosphorylated IRF3, but not NF- $\kappa$ B, appears to be responsible for enhancing the transcription  
653 of DUOX2 mRNA and the subsequent production of an enzymatically active oxidase that  
654 produces a flux of H<sub>2</sub>O<sub>2</sub> capable of crossing cell membranes. Our experiments have also shown  
655 that extracellular cGAMP can be imported into PDAC cells, enhancing DUOX2 expression  
656 directly in the absence of extracellular DNA. Exogenous IFN- $\beta$  signals downstream through  
657 Stat1/2 to increase DUOX2 protein expression. However, although exogenous IFN- $\beta$  capably  
658 upregulates DUOX2, when the cytokine is generated intracellularly as a consequence of cGAS-  
659 STING signaling in PDAC cells, IFN- $\beta$  signaling is limited and does not appear to contribute  
660 substantively to the expression of DUOX2. Reactive oxygen species generated by DUOX2  
661 facilitate increased, normoxic expression of HIF-1 $\alpha$  and DNA double strand cleavage that could  
662 sustain an oxidative, pro-inflammatory environment. Acutely, this might foster tumor immunity;  
663 however, chronic cGAS-STING-induced DUOX2 expression could promote DNA double strand  
664 breakage enhancing genetic instability. (Abbreviations used in the figure: DUOX2, dual oxidase  
665 2; CDNs, cyclic dinucleotides; cGAS, cyclic GMP-AMP Synthase; STING, Stimulator of  
666 Interferon Genes; cGAMP, cyclic GMP-AMP; IFN- $\beta$ , interferon beta; dsDNA, double stranded  
667 DNA; TBK1, Tank-binding kinase 1; IRF3, interferon regulatory factor 3; IRF9, Interferon  
668 regulatory factor 9; STAT1/2, Signal transducer and activator of transcription 1 or 2; ROS,  
669 reactive oxygen species; HIF-1 $\alpha$ , Hypoxia-Inducible Factor 1; figure adapted from [37])

**Figure 1**

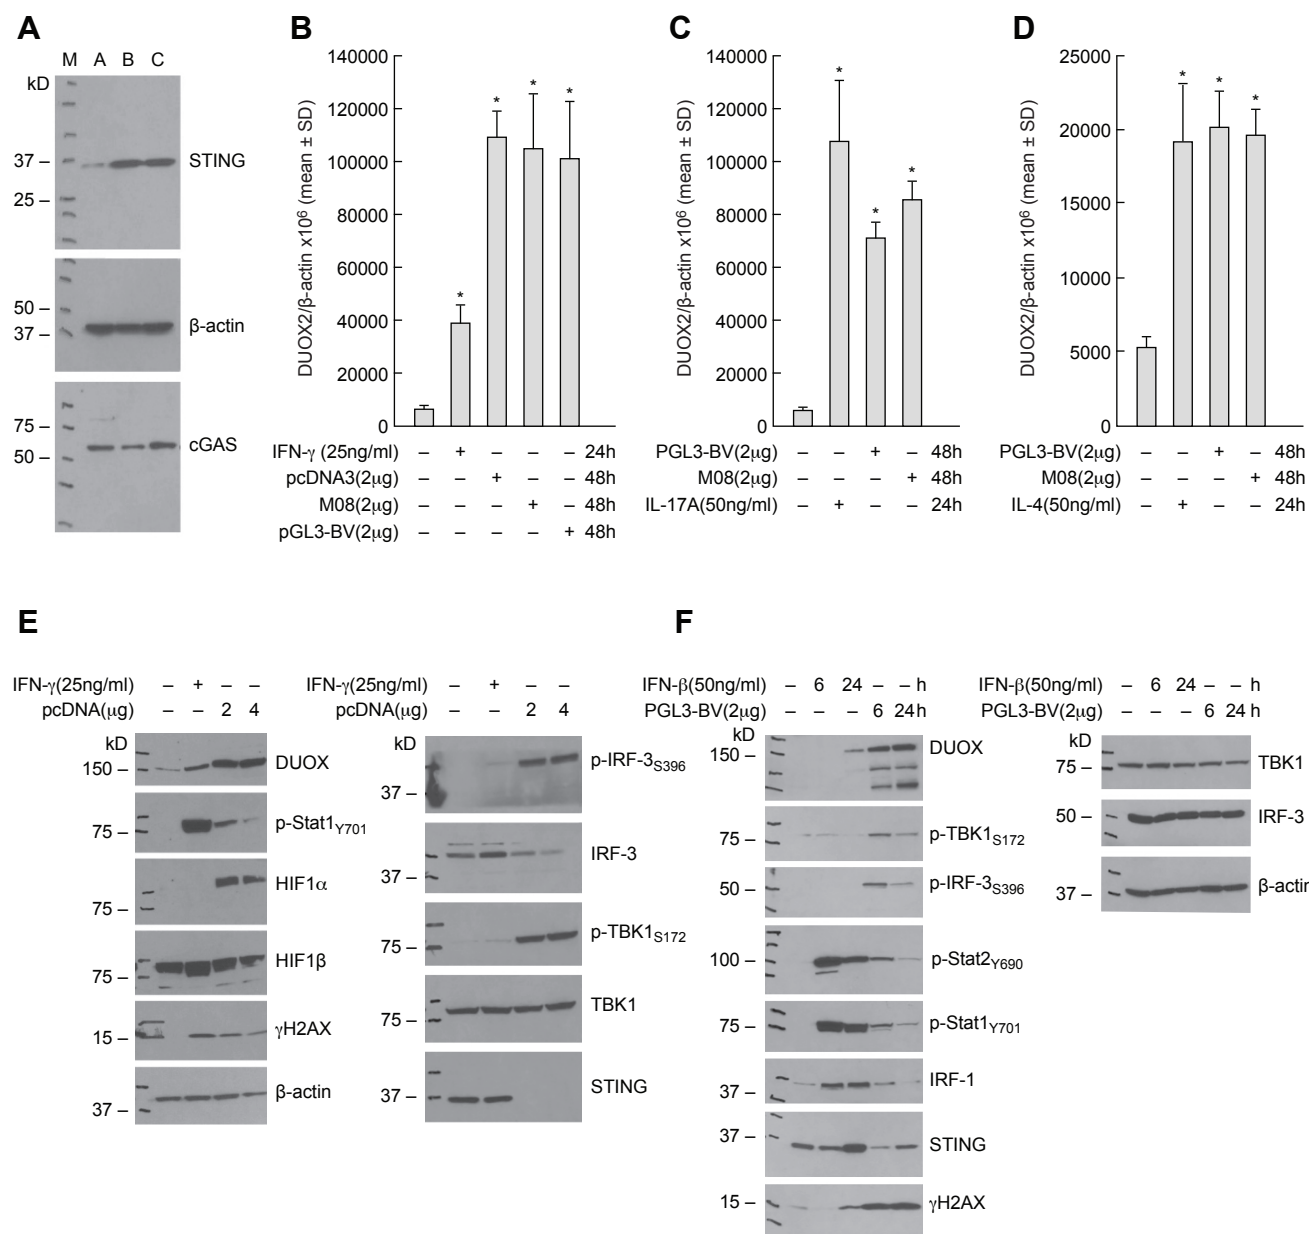



**Figure 2**

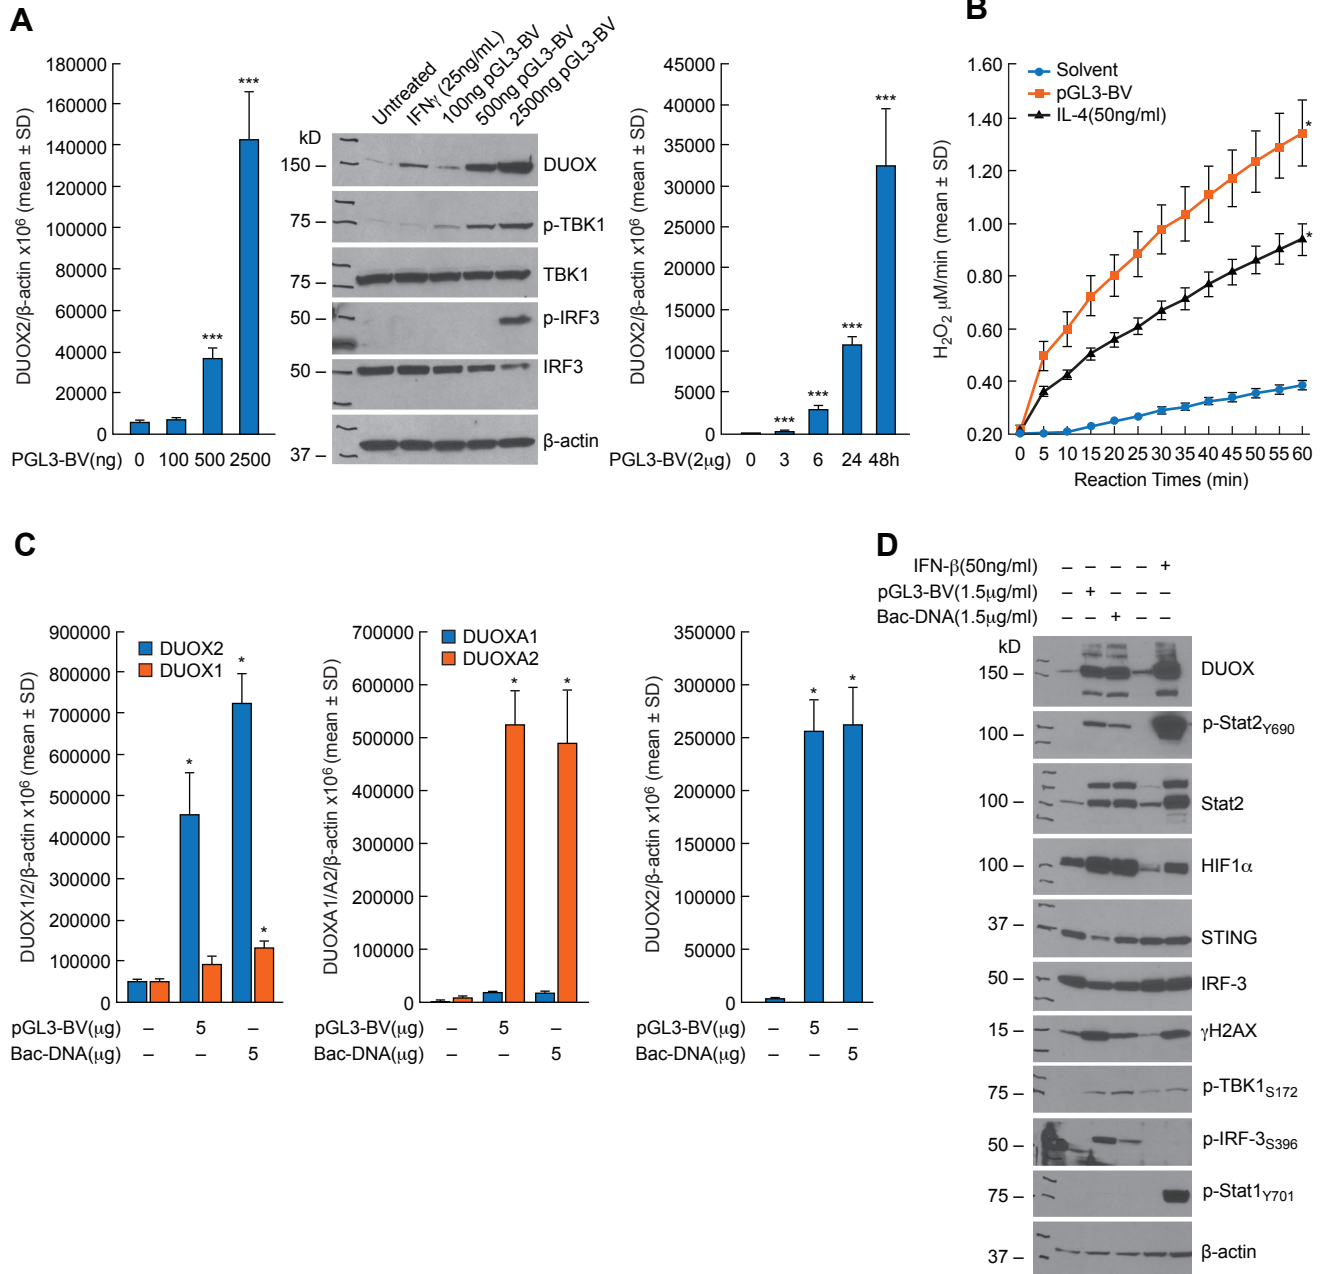

**Figure 3**

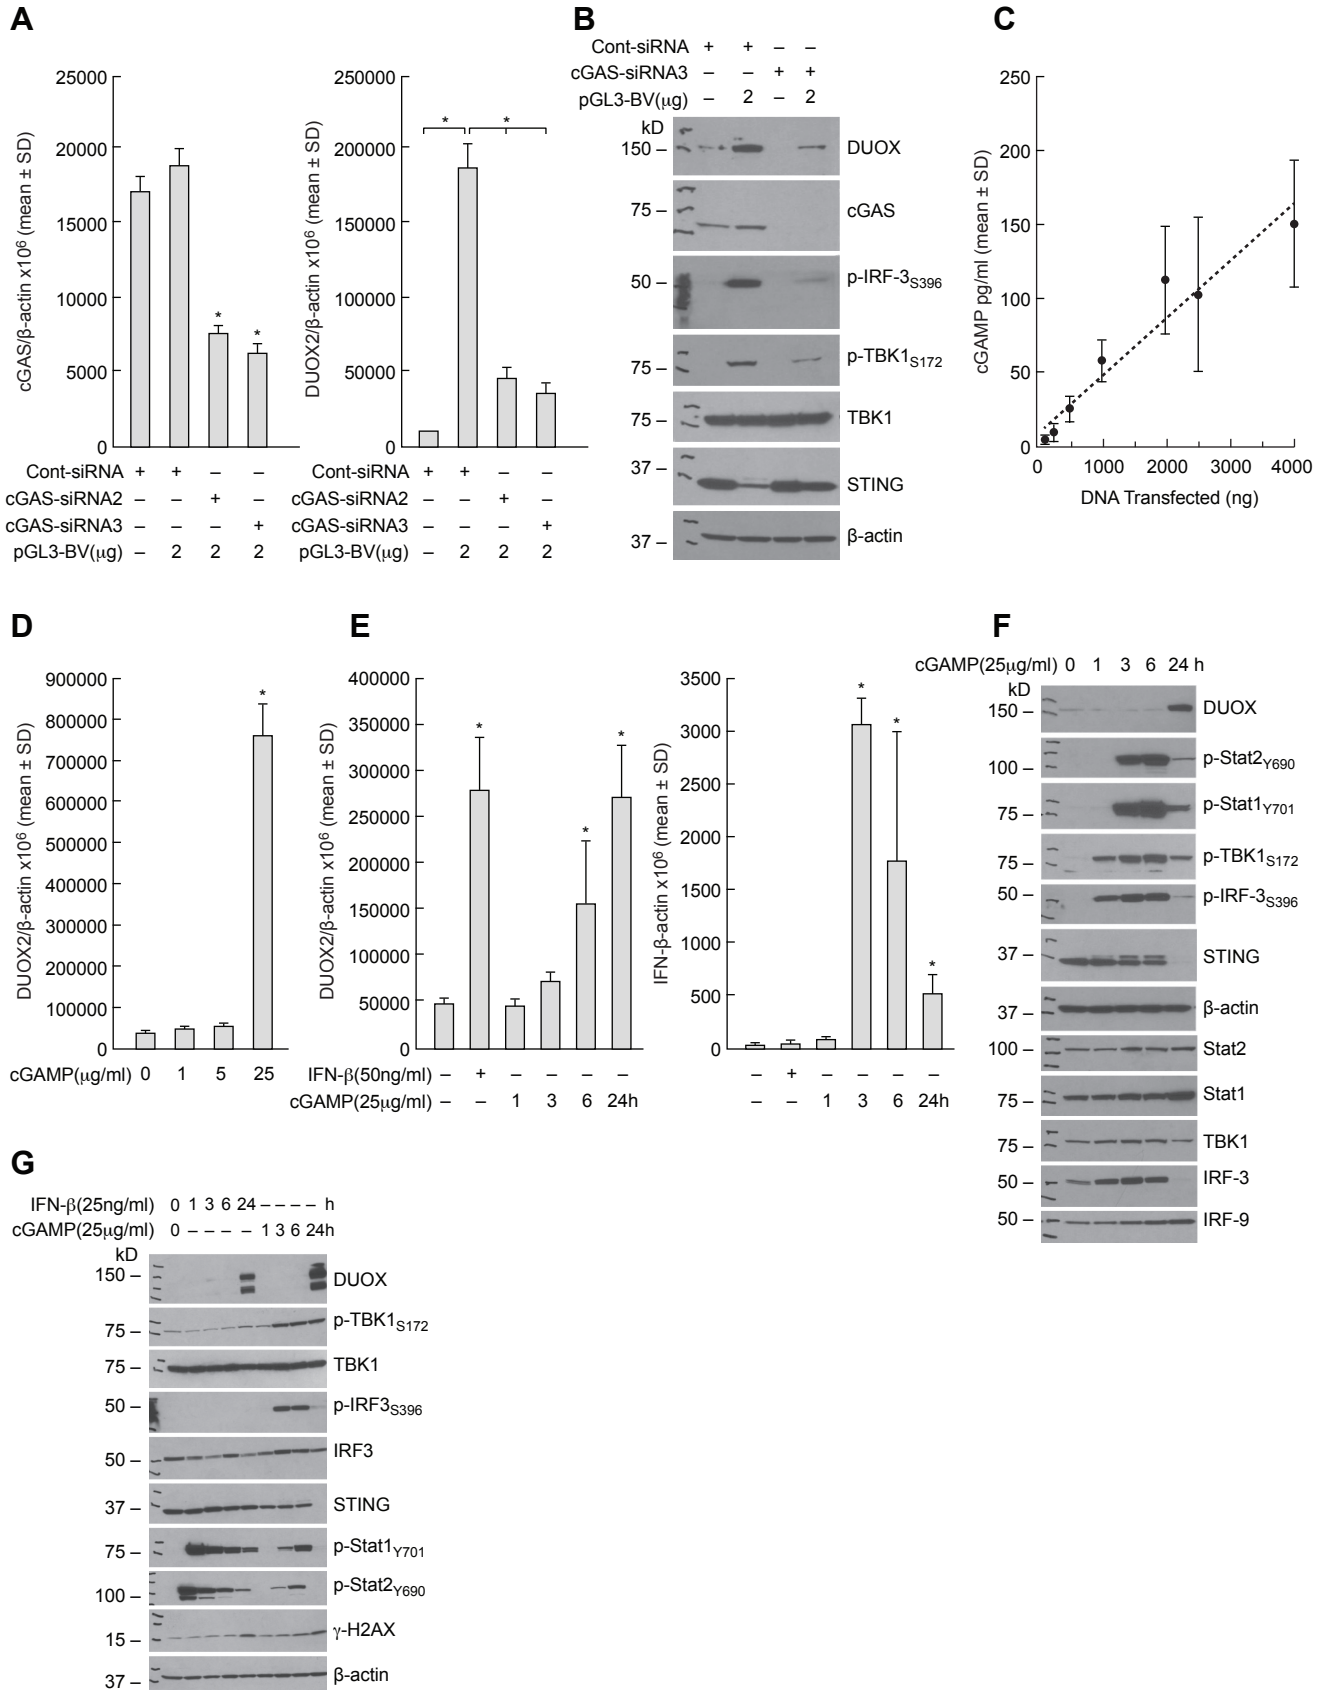

**Figure 4**

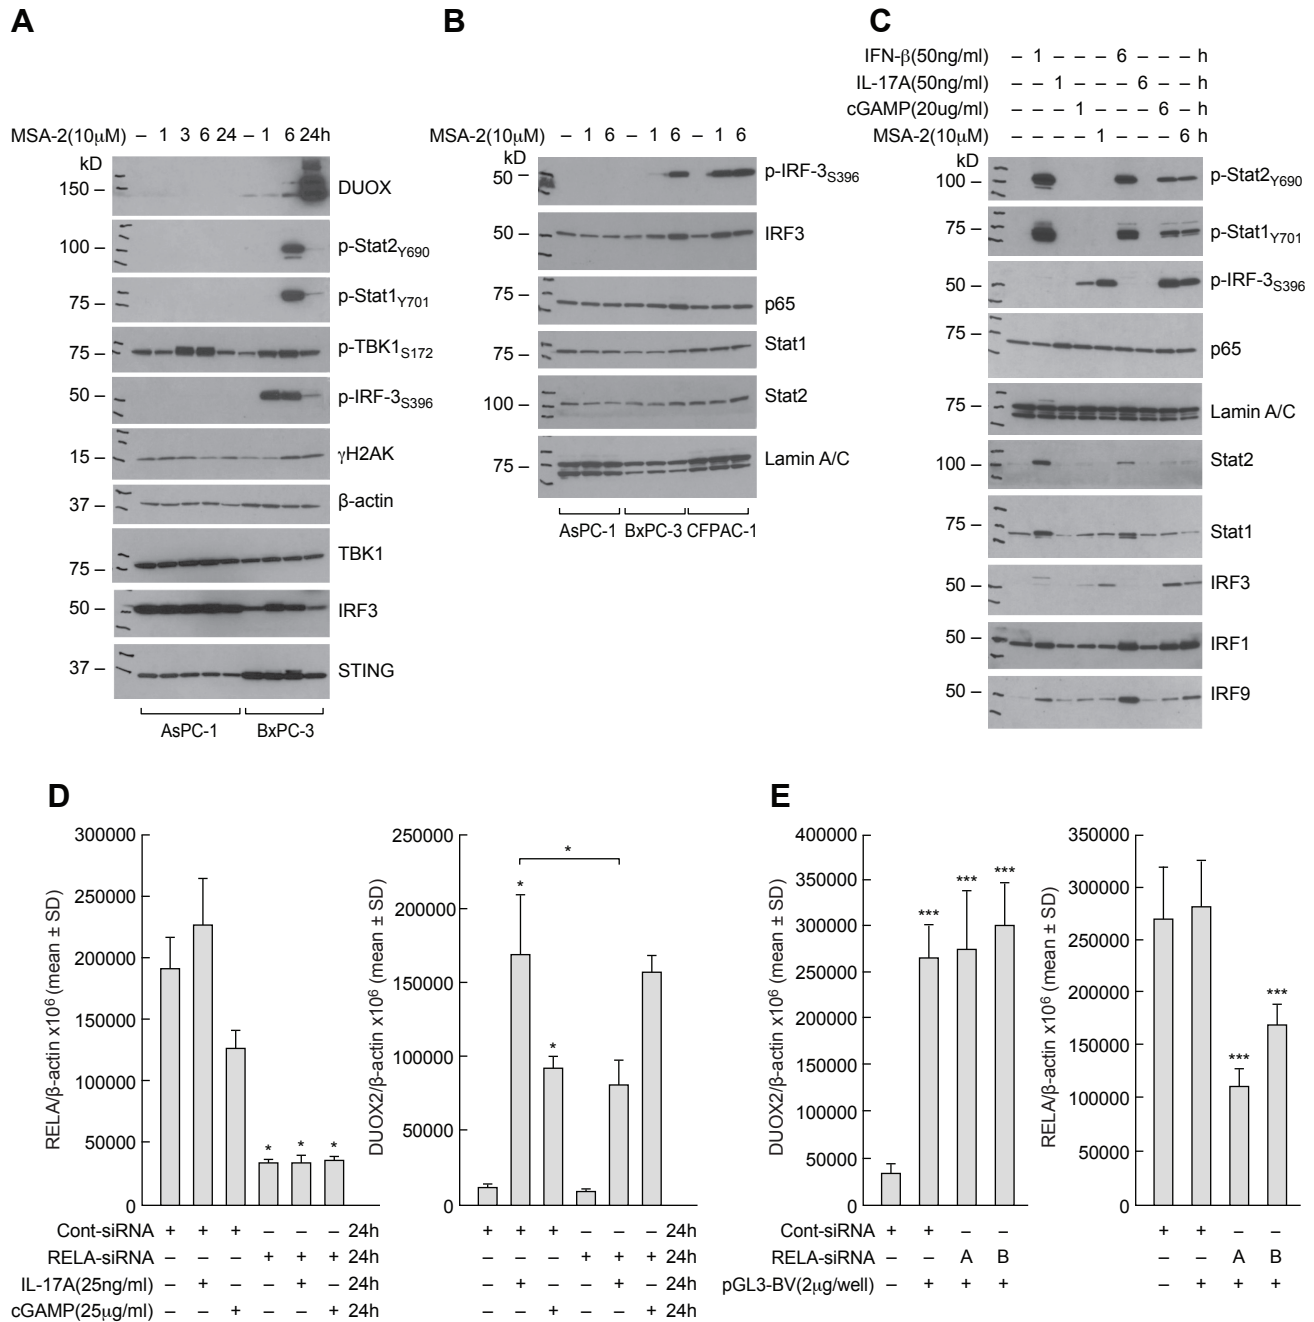

**Figure 5**

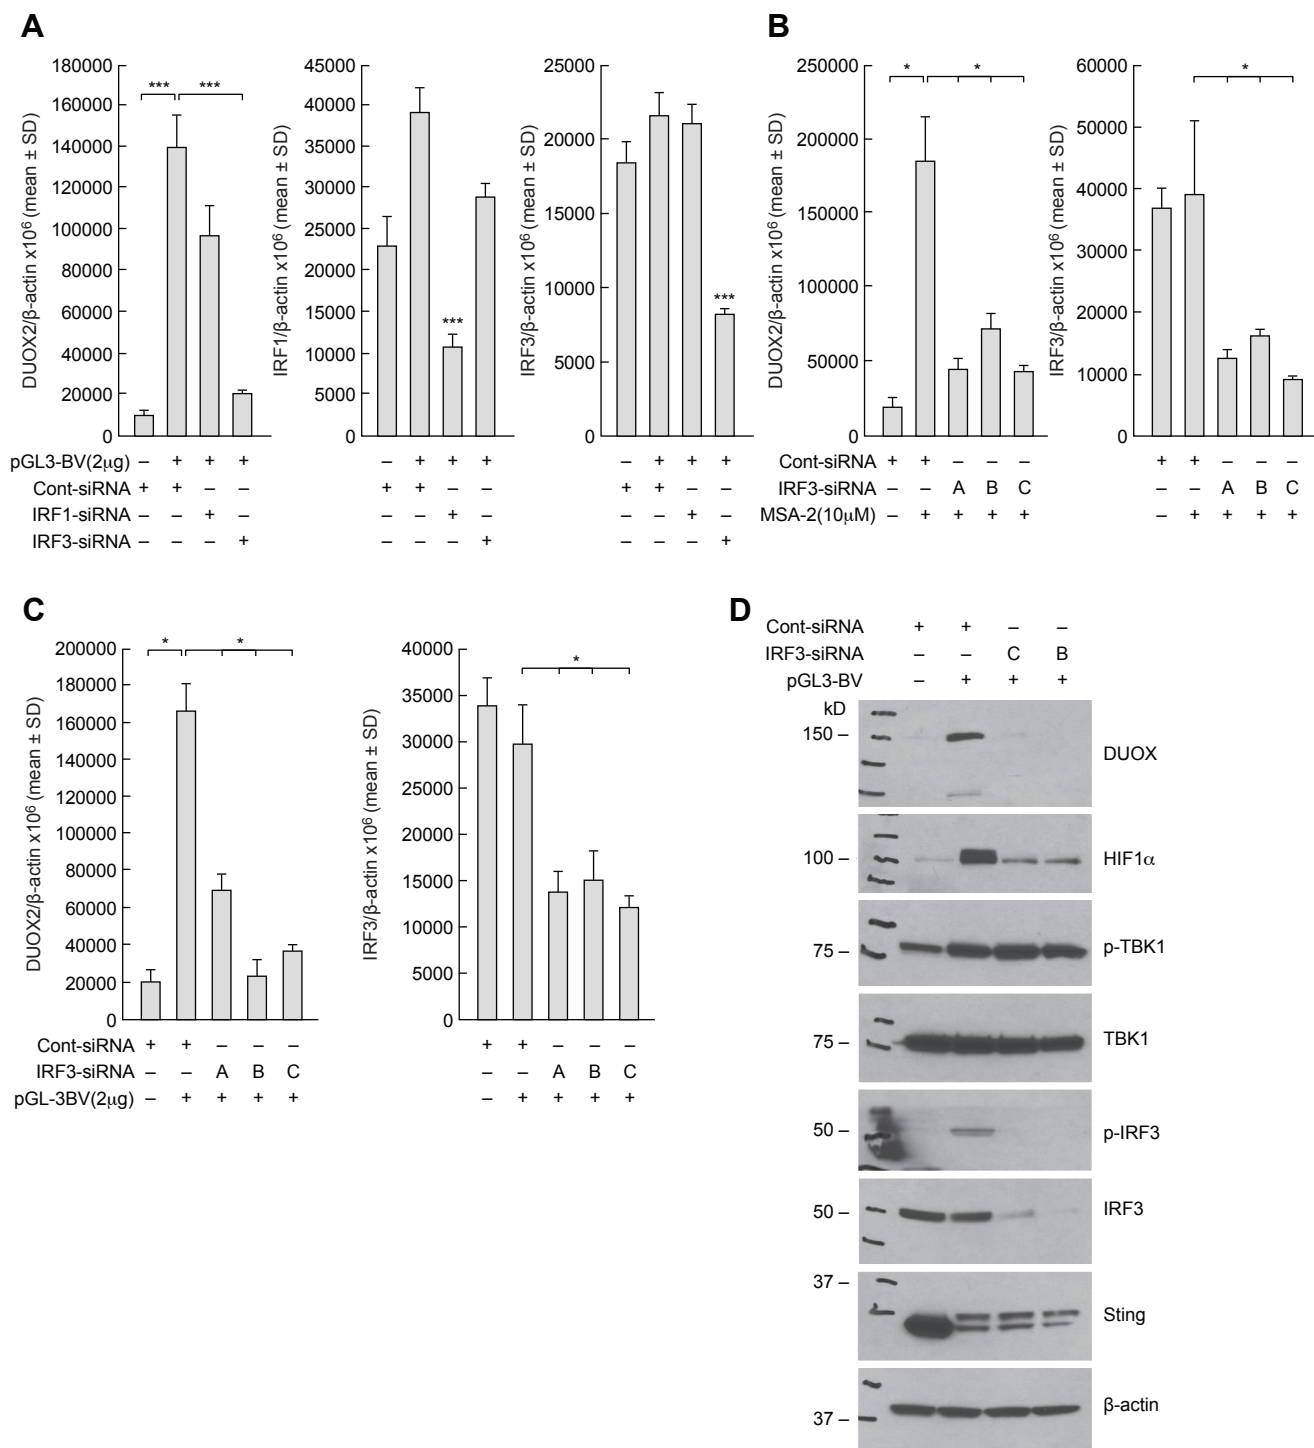

# Exogenous DNA Sources

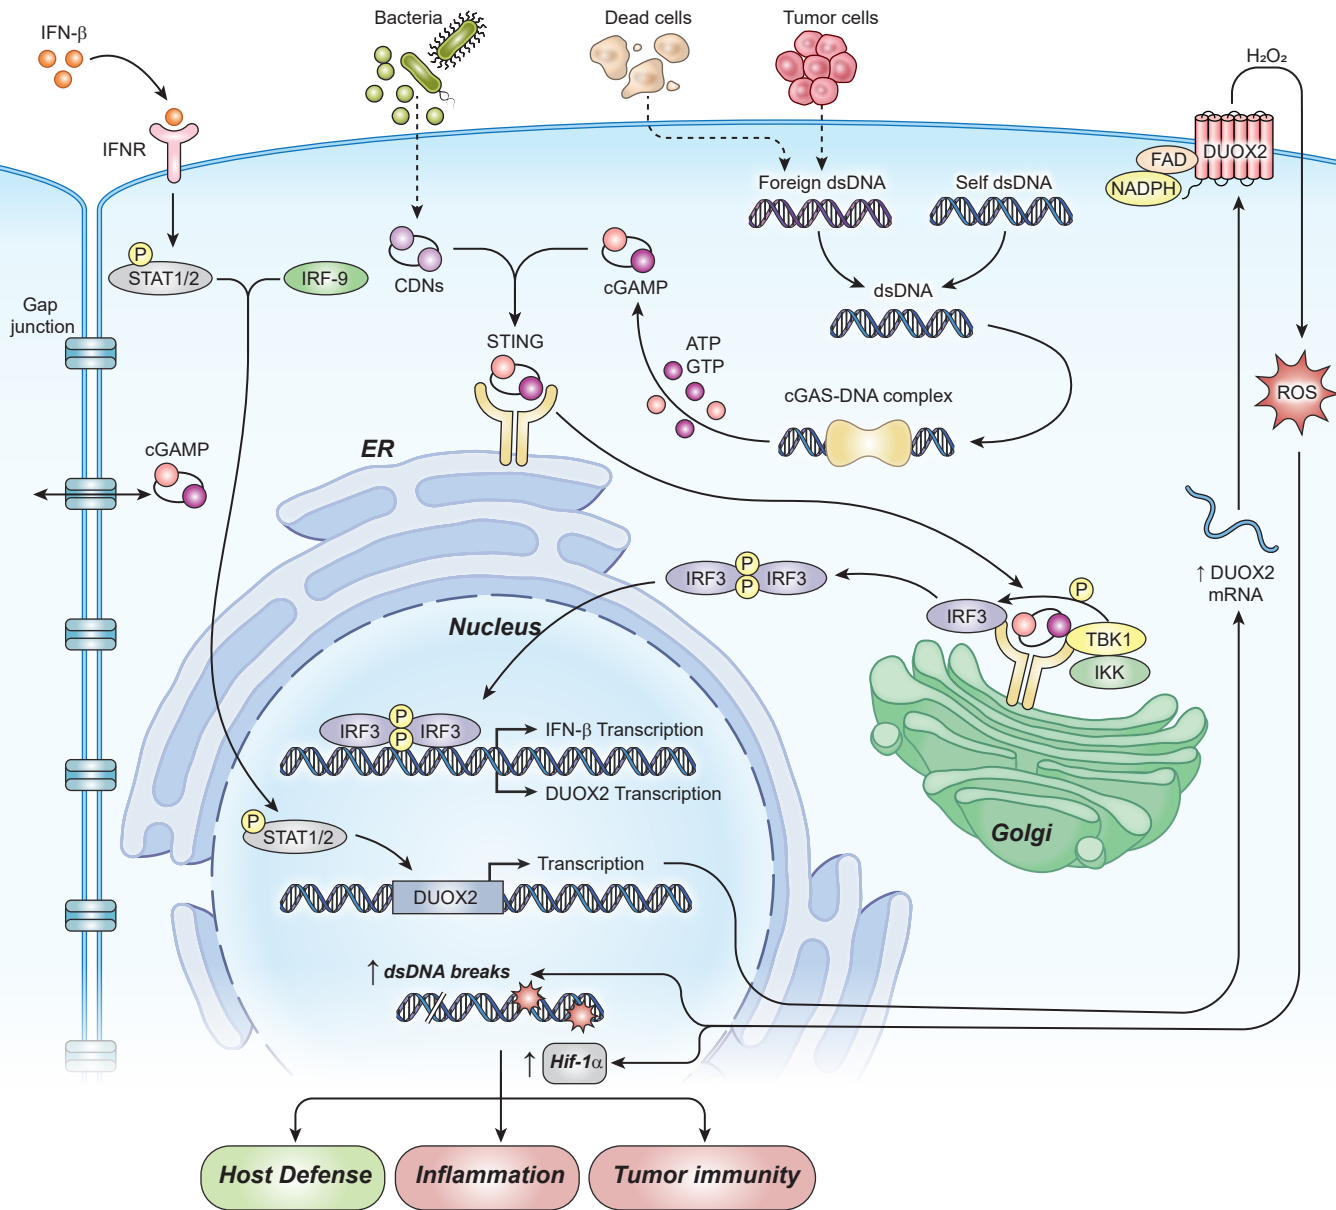

Source: https://www.biorxiv.org/content/10.1101/2022.05.14.491678v1.full.pdf
