# Supplementary material for: Exogenous DNA upregulates DUOX2 expression and function in human pancreatic cancer cells by activating the cGAS-STING signaling pathway
Source: bioRxiv or medRxiv preprint supplement (doi:10.1101/2022.05.14.491678), 2022-05-14

## 1 SUPPLEMENTARY INFORMATION

2 Wang et al.

3

### 4 Supplementary Methods

5

#### 6 Cell culture, antibodies, plasmids, primers, and reagents

7 Human pancreatic cancer cell lines: BxPC-3 (CRL-1687), CFPAC-1 (CRL-1918), AsPC-1  
8 (CRL-1682), and Hs 766T (HTB-134); human colon cancer cell lines: Ls513 (CRL-2134), HT-  
9 29 (HTB-38), and T84 (CCL-248) were obtained from the American Type Culture Collection  
10 (ATCC, Manassas, VA). BxPC-3, AsPC-1, and Ls513 cells were cultured in RPMI-1640  
11 medium (HyClone SH30027.01) supplemented with 10% Fetal Bovine Serum (FBS, Gemini  
12 Bio-Products 100-106) and 1% 100 mM sodium pyruvate (Gibco) by volume. Hs 766T cells  
13 were cultured in Dulbecco's Modified Eagle's Medium (DMEM) (ATCC 30-2002)  
14 supplemented with 10% FBS. CFPAC-1 cells were cultured in Iscove's Modified Dulbecco's  
15 Medium (ATCC 30-2005) supplemented with 10% FBS. HT-29 cells were cultured with  
16 McCoy's 5a Medium Modified (ATCC 30-2007) supplemented with 10% FBS. T84 cells were  
17 cultured with DMEM:F-12 Medium (ATCC 30-2006) supplemented with 5% FBS.

18 Antibodies against cGAS (15102), STING (3337), p-NF- $\kappa$ B p65<sub>S536</sub> (3033), NF- $\kappa$ B p65  
19 (8242), TBK1 (38066), p-TBK1 (5483), p-IRF3<sub>S396</sub> (4947), IRF3 (4302), p-Stat2<sub>Y690</sub> (88410),  
20 IRF9 (76684), HIF1 $\beta$  (3718), Stat1 (9175), p-Stat1<sub>Y701</sub> (9167),  $\gamma$ -H2AX<sub>S139</sub> (2577), Lamin A/C  
21 (2032), and  $\beta$ -actin (3700) were purchased from Cell Signaling Technologies (CST, Beverly,  
22 MA). HIF-1 $\alpha$  (610959) and Stat2 (610187) antibodies were from BD transduction Laboratory.  
23 IRF1 (s497) antibody was purchased from Santa Cruz Biotechnology (Santa Cruz, CA). Mouse

24 monoclonal antibody, which reacts with both human DUOX1 and DUOX2, was developed by  
25 Creative Biolabs (Port Jefferson Station, NY) and characterized by our laboratory [1].

26 The plasmids used in these studies included: pGL3-Basic Vector (pGL3-BV, E1751),  
27 Bacterial strain JM109 for bacterial genomic DNA extraction (P9751) from Promega,  
28 pcDNA3.1-HA plasmid (pcDNA3,128034) from Addgene, and pReceiver-M08 plasmid(EX-  
29 NEG-M08) from GeneCopoeia. The STING agonist MSA-2 (HY-136927) was from MedChem  
30 Express. Recombinant human cytokines Human IL-4 (204-IL-050), Human IL-17A (317-ILB-  
31 050), Human IFN- $\alpha$  (11100-1) and Human IFN- $\beta$  (8499-IF-010) were from R & D Systems. 2'-  
32 3' cGAMP (tlrl-nacga23-5) was obtained from InvivoGen,

33 The following primers used for Q-PCR in this study were purchased from Applied  
34 Biosystems: DUOX2 (Hs00204187\_m1), DUOXA2 (Hs01595310\_m1), DUOX1  
35 (Hs00213694\_m1), DUOXA1 (Hs00328806\_m1), NOX1 (Hs00246589\_m1), cGAS  
36 (Hs00403553\_m1), STING (Hs00736955\_g1), IRF3 ( Hs01547283\_m1), IRF1  
37 (Hs00971965\_m1),  $\beta$ -actin (Hs01060665\_g1), IFN- $\beta$  (Hs01077958\_s1), IRF-9  
38 (Hs00196051\_m1), STAT2 (Hs01013119\_g1), RELA ( Hs01042010\_m1), and STAT1  
39 (Hs00234829\_m1). IRF-1 siRNA-A: Silencer Select Human IRF-1 siRNA, was from Ambion  
40 (s7501); IRF-1 siRNA-B: On-Target plus Smart pool human IRF1, was from Dharmacon  
41 (011704-00-10). RELA siRNA, On-Target plus SMART pool Human RELA (L-003533-00)  
42 was obtained from Dharmacon; RELA-A and B, RELA Silencer select siRNA, were from  
43 Ambion (S11914 and S11915); On-Target plus Human STAT1 siRNA, Smart pool, was  
44 purchased from Dharmacon (L-003543-00-0010). cGAS siRNA-2, On-Target plus Human  
45 MB21D1 siRNA, SMART Pool, was from Dharmacon (L-015607-02-0020); cGAS siRNA-3,  
46 Silencer pre-designed siRNA, was from Ambion (s129126). On-Target plus Human STAT2

47 siRNA-A, Smart Pool(L-012064-00-0020); On-Target plus SMART siRNA Human STAT2-B  
48 (J-012064-08-0010); and On-Target plus SMART siRNA Human STAT2-C (J-012064-06-0010)  
49 were from Dharmacon. IRF3 siRNA-A and B, IRF3 Silencer Select siRNA (s7508 and s7509)  
50 were from Ambion; IRF3 siRNA-C: siGENOME human IRF3 siRNA SMART pool (M-006875-  
51 02-0020) was from Dharmacon.

52

### 53 **Supplementary Figure Legends**

54

55 **Supplementary Fig. S1 Effect of exogenous DNA or proinflammatory cytokines on NADPH**  
56 **oxidase expression in human colon cancer cell lines.** A Ls513 human colon cancer cells were  
57 transfected with either two different DNA plasmids or treated with IL-17A and examined for the  
58 expression of NOX1 or DUOX2 48 h after transfection or 24 h following cytokine treatment,  
59 respectively. \* $P < 0.05$ . B DUOX2 expression was examined in T84 human colon cancer cells  
60 48 h following transfection with a DNA plasmid or after a 24 h exposure to the combination of  
61 IL-17A and IL-4 evaluated as a positive control. \* $P < 0.05$ . C DUOX2 mRNA expression was  
62 determined by RT-PCR in HT-29 human colon cancer cells 48 and 72 h following transfection  
63 with the pGL3-BV plasmid or exposure to the combination of IL-17A and IL-6 for 72 h.  
64 \* $P < 0.05$ . These data represent results from three independent experiments.

65

66 **Supplementary Fig. S2 Concentration- and time-dependent effects of the STING agonist**  
67 **MSA-2 and cGAMP on DUOX expression and cGAS-STING signal transduction in human**  
68 **pancreatic cancer cells.** A Comparison of the effects of two concentrations of the STING  
69 agonist MSA-2 versus IL-17A on the expression of DUOX2 in BxPC-3 cells. Tumor cells were

70 exposed to MSA-2 for 48 h and to IL-17A for 24 h.  $*P < 0.05$ . **B** Relationship of MSA-2  
71 concentration to the expression of DUOX2 following 48 h of drug exposure in CFPAC-1  
72 pancreatic cancer cells.  $*P < 0.05$ . **C** Time course examining the relationship between time of  
73 exposure for cGAMP and MSA-2 and DUOX expression and activation of cGAS-STING signal  
74 transduction in the BxPC-3 cell line. **D** Relationship between time of exposure for cGAMP and  
75 MSA-2 as well as co-treatment with dexamethasone on DUOX expression, cGAS-STING  
76 signaling, and DNA double strand scission in CFPAC-1 cells. The results presented represent at  
77 least three independent experiments.

78

79 **Supplementary Fig. S3 Role of Stat1 and Stat2 in plasmid-enhanced DUOX2 mRNA**

80 **expression.** **A** Effect of Stat1 siRNA on pGL3-BV-enhanced expression of DUOX2 (right  
81 panel) as well as on Stat1 expression itself (left panel) in BxPC-3 cells. Real time PCR for  
82 DUOX2 and Stat1 mRNA was performed 48 h following plasmid and siRNA co-transfection.  
83  $***P < 0.01$ . **B** Effect of Stat2 siRNA on the expression of DUOX2 (left panel) or Stat2 (right  
84 panel) following pGL3-BV transfection in BxPC-3 cells; exposure times for plasmid and siRNA  
85 were identical to Supplementary Fig. S3A.  $***P < 0.01$ . **C** Effect of Stat2 siRNA on the  
86 expression of DUOX2 (left panel) and Stat2 (right panel) 24 h after siRNA transfection prior to a  
87 24 h exposure to IFN- $\beta$  or a 24 h treatment with MSA-2 (10  $\mu$ M).  $*P < 0.05$ . **D** Effect of  
88 multiple Stat2 siRNAs on DUOX2 (left panel) or Stat2 (right panel) expression following IFN- $\beta$   
89 treatment. Experiments performed as in figure S3C.  $***P < 0.01$ . **E** Effect of multiple Stat2  
90 siRNAs on DUOX2 (left panel) or Stat2 (right panel) expression following pGL3-BV  
91 transfection. QPCR for DUOX2 and Stat2 mRNA was performed 48 h following plasmid and  
92 siRNA co-transfection.  $***P < 0.01$ . **F** Effect of multiple Stat2 siRNAs on DUOX2 (left panel)

93 or Stat2 (right panel) expression following cGAMP treatment. Stat2 siRNAs transfected into  
94 BxPC-3 cells 24 h before initiation of a 24 h exposure to cGAMP. \*\*\* $P < 0.01$ . **G** Effect of  
95 IRF1 siRNAs on plasmid-enhanced DUOX2 mRNA expression. Real time PCR for DUOX2 and  
96 IRF1 mRNA was performed 48 h following plasmid and siRNA co-transfection. \*\*\* $P < 0.01$ .  
97 These studies were conducted in triplicate.

98

99 **Supplementary Reference**

100

101 1. Wu Y, Antony S, Hewitt SM, Jiang G, Yang S, Meitzler JL et al. Functional activity and  
102 tumor-specific expression of Dual Oxidase 2 in pancreatic cancer cells and human malignancies  
103 characterized with a novel monoclonal antibody. Int J Oncol. 2013;42:1229-1238.

104

105

**Suppl. Fig. S1**

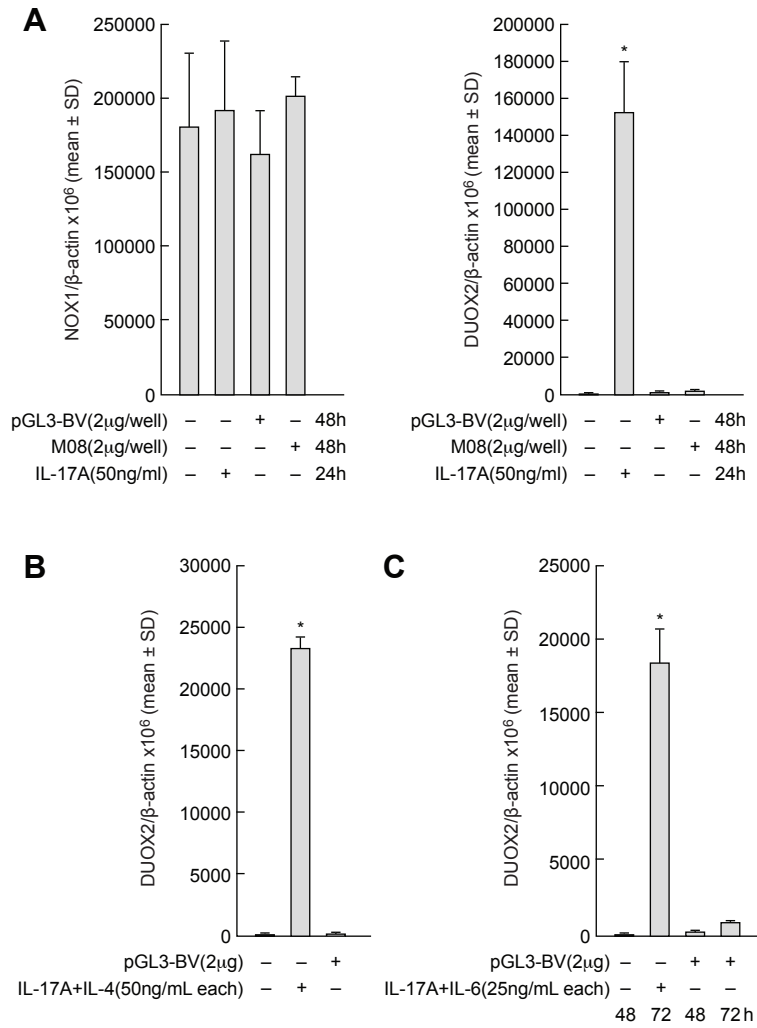

## Suppl. Fig. S2

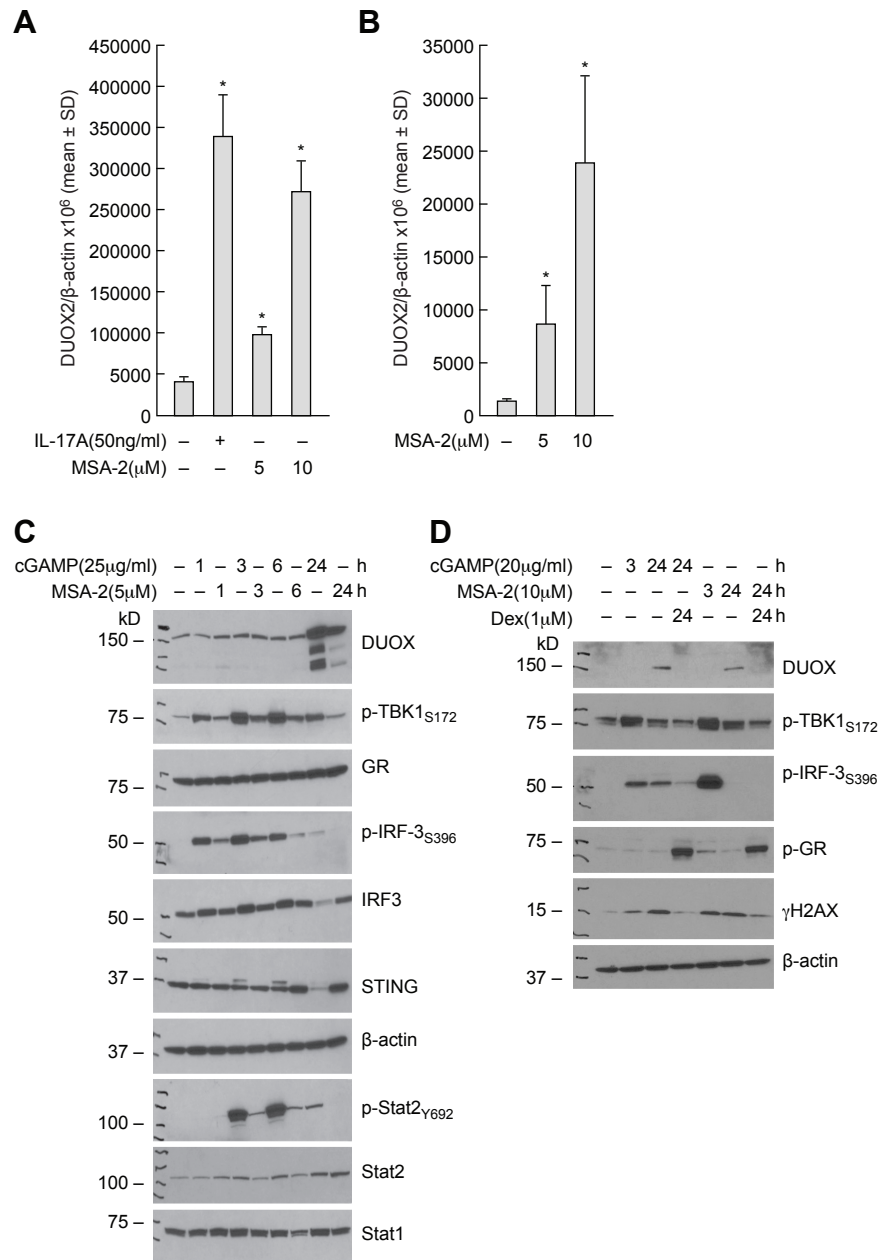

# Suppl. Fig. S3

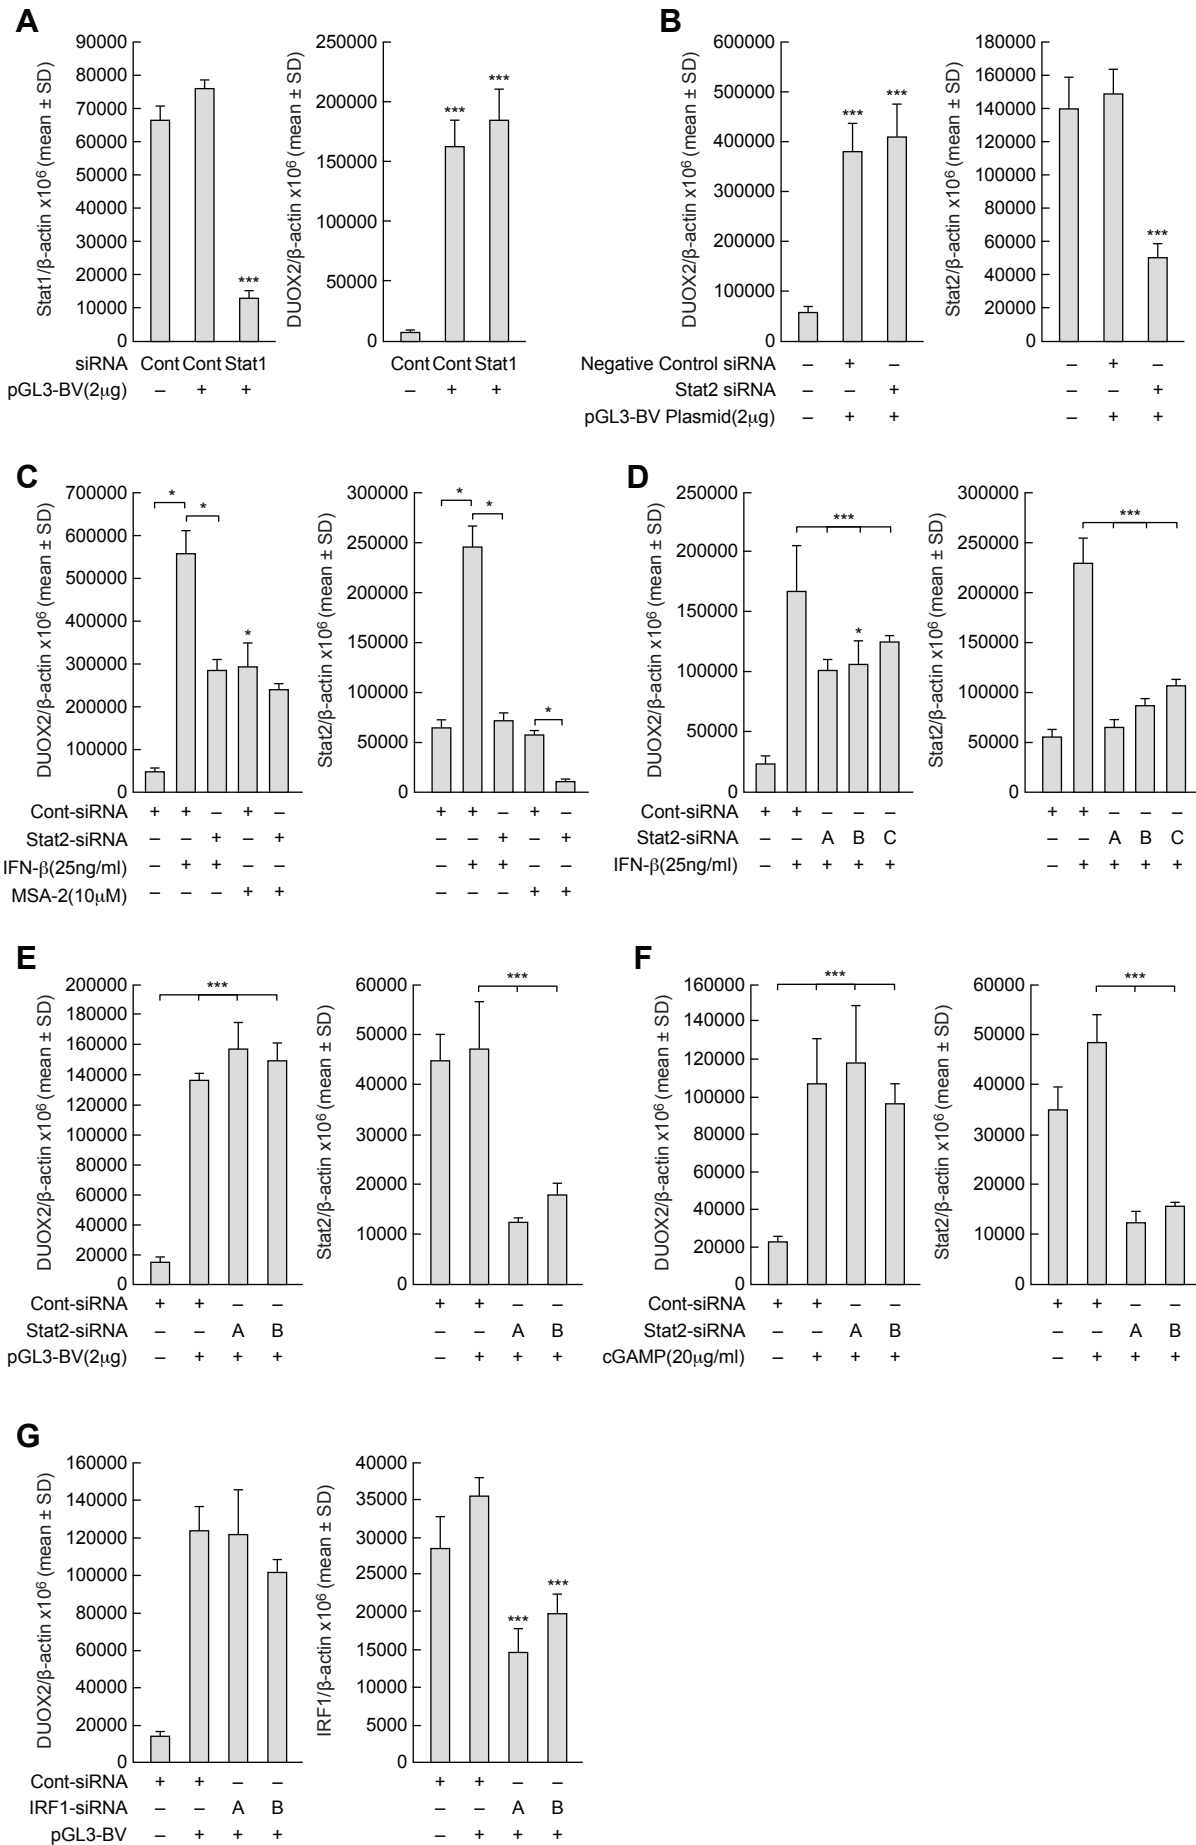

Supplement: Supplementary file [file media-1.pdf]
